# Supplementary material
Source: PubMed Central journal article supplement (PMC3839714)
Supplement: 1301262110_st01.pdf [file 1301262110_st01.pdf]

## Conserved muscle genes analysed

| Drosophila melanogaster    |                |                 | Danio Rerio                                             |
|----------------------------|----------------|-----------------|---------------------------------------------------------|
| GO category                | CG number      | Gene name       |                                                         |
| Glycolysis                 | <b>CG1721</b>  | <b>Pglym78</b>  | <b>pgam2</b>                                            |
|                            | <b>CG8251</b>  | <b>Pgi</b>      | <b>gpia</b>                                             |
| Pyruvate metabolism        | <b>CG10160</b> | <b>ImpL3</b>    | <b>ldhb, ldha</b>                                       |
|                            | <b>CG7430</b>  |                 | <b>dldh</b>                                             |
| Oxidative phosphorylations | <b>CG7361</b>  | <b>RFeSP</b>    | <b>uqcrfs1</b>                                          |
| Citrate cycle              | <b>CG7998</b>  |                 |                                                         |
| ATPases                    | <b>CG3725</b>  | <b>Ca-P60A</b>  | <b>atp2a1, atp2a2a</b>                                  |
| Other metabolism pathways  | <b>CG6022</b>  | <b>Cchl</b>     | <b>hccs</b>                                             |
| Nucleic Acids binding      | <b>CG5330</b>  | <b>Nap1</b>     | <b>nap1l1, nap1l4a</b>                                  |
|                            | <b>CG10922</b> | <b>La</b>       | <b>ssb</b>                                              |
|                            | <b>CG5170</b>  | <b>Dp1</b>      | <b>hdlbp, wu:fa07b03</b>                                |
|                            | <b>CG6937</b>  |                 | <b>mki67ip</b>                                          |
|                            | <b>CG1429</b>  | <b>Mef2</b>     | <b>mef2a</b>                                            |
| Amino Acids metabolism     | <b>CG2674</b>  | <b>M(2)21AB</b> | <b>mat1a</b>                                            |
|                            | <b>CG32031</b> | <b>Argk</b>     | <b>ckma, ckmt2, zgc:56085, ckb</b>                      |
| Protein biosynthesis       | <b>CG11267</b> |                 | <b>hspe1</b>                                            |
|                            | <b>CG32409</b> |                 | <b>rrs1</b>                                             |
| Transporter/carrier        | <b>CG6756</b>  | <b>Tom70</b>    | <b>tomm70a</b>                                          |
|                            | <b>CG2713</b>  | <b>ttn50</b>    | <b>timm50</b>                                           |
| ECM and cytoskeleton       | <b>CG4843</b>  | <b>Tm2</b>      | <b>tpm3, tpma, tpm2</b>                                 |
|                            | <b>CG7178</b>  | <b>WupA</b>     | <b>tnni2a.1, tnni2a.2, tnni2a.3, tnni2a.4, tnni2b.2</b> |
|                            | <b>CG4376</b>  | <b>Actn</b>     | <b>actn3a</b>                                           |
|                            | <b>CG4027</b>  | <b>Act5C</b>    | <b>acta1a, acta1b, acta2</b>                            |
|                            | <b>CG18290</b> | <b>Act87E</b>   | <b>acta1a, acta1b, acta2</b>                            |
|                            | <b>CG10067</b> | <b>Act57B</b>   | <b>acta1a, acta1b, acta2</b>                            |
| Not known                  | <b>CG9131</b>  | <b>kisir</b>    | <b>slmo2</b>                                            |
|                            | <b>CG11444</b> |                 | <b>pdap1</b>                                            |
|                            | <b>CG1430</b>  | <b>bys</b>      | <b>bysl</b>                                             |

## All conserved muscle genes

| Drosophila melanogaster    |           |           | Danio Rerio                 |
|----------------------------|-----------|-----------|-----------------------------|
| GO category                | CG number | Gene name |                             |
| Glucose metabolism         | CG1721    | Pglym78   | pgam2                       |
|                            | CG8251    | Pgi       | gpia                        |
|                            | CG3001    | Hex-A     | zgc:55926                   |
|                            | CG4001    | Pfk       | pfkma                       |
|                            | CG2171    | Tpi       | tpi1b                       |
|                            | CG12055   | Gapdh1    | gapdh                       |
|                            | CG3127    | Pgk       | pgk1                        |
|                            | CG7070    | PyK       | pkm2b                       |
|                            | CG31692   | fbp       | fbp2                        |
|                            | CG6767    |           | prps1a                      |
| CG7254                     | GlyP      | pygma     |                             |
| Pyruvate metabolism        | CG10160   | ImpL3     | ldhb, ldha                  |
|                            | CG7430    |           | dldh                        |
|                            | CG10120   | Men       | me2, me3                    |
|                            | CG11876   |           | pdhb                        |
| Oxidative phosphorylations | CG7361    | RFeSP     | uqcrfs1                     |
|                            | CG17246   | Scs-fp    | sdha                        |
|                            | CG17280   | levy      | cox6a1                      |
|                            | CG1746    |           | atp5g                       |
|                            | CG2968    |           | atp5d                       |
|                            | CG10664   |           | cox4i1                      |
|                            | CG3283    | SdhB      | sdhb                        |
|                            | CG3683    |           | ndufa8                      |
|                            | CG4307    | Oscp      | atp5o                       |
|                            | CG4769    |           | cyc1                        |
|                            | CG6020    |           | ndufa9                      |
|                            | CG6030    | ATPsyn-d  | atp5h                       |
|                            | CG6343    | ND42      | ndufa10                     |
| CG9140                     |           | ndufv1    |                             |
| Citrate cycle              | CG7998    |           | zgc:64133                   |
|                            | CG12233   | I(1)G0156 | idh3a                       |
| ATPases                    | CG3725    | Ca-P60A   | atp2a1, atp2a2a             |
|                            | CG5596    | Mlc1*     | zgc:77231, mylz3, zgc:66286 |
|                            | CG1746    |           | zgc:73293                   |
|                            | CG31045   | Mhcl      | myo18l1                     |
|                            | CG5525    |           | cct4                        |
|                            | CG1416    |           | ahsa1                       |
| Other metabolic pathways   | CG6022    | Cchl      | hccs                        |
|                            | CG7356    |           | tgm2                        |
|                            | CG8353    |           | zgc:103586                  |

|                                         |              |                  |                            |
|-----------------------------------------|--------------|------------------|----------------------------|
| <i>Nucleic Acids/ Chromatin binding</i> | CG5330       | <i>Nap1</i>      | <i>nap111, nap114a</i>     |
|                                         | CG10922      | <i>La</i>        | <i>ssb</i>                 |
|                                         | CG5170       | <i>Dp1</i>       | <i>hdlbp, wu:fa07b03</i>   |
|                                         | CG6937       |                  | <i>mki67ip</i>             |
|                                         | CG1429       | <i>Mef2*</i>     | <i>mef2a, mef2ca</i>       |
|                                         | CG1897       | <i>Msh*</i>      | <i>msxe</i>                |
|                                         | CG5441       | <i>dej*</i>      | <i>mespa, mespb</i>        |
|                                         | CG8542       | <i>Hsc70-5</i>   | <i>hspa9b</i>              |
|                                         | CG7006       |                  | <i>nip7</i>                |
|                                         | CG6388       |                  | <i>im:7150454</i>          |
|                                         | CG6375       | <i>pit</i>       | <i>ddx18, pit</i>          |
|                                         | CG8545       |                  | <i>im:6893299</i>          |
|                                         | CG5258       | <i>NHP2</i>      | <i>nhp2</i>                |
|                                         | CG4882       |                  | <i>zgc:100970</i>          |
|                                         | CG4033       | <i>Rpl35</i>     | <i>zgc:66298</i>           |
|                                         | CG3800       |                  | <i>zff9</i>                |
|                                         | CG3249       | <i>yu</i>        | <i>akap1b</i>              |
|                                         | CG9809       |                  | <i>ppargc1a1, ppargc1b</i> |
|                                         | CG17334      | <i>lin-28</i>    | <i>lin28</i>               |
|                                         | CG12792      | <i>l(2)09851</i> | <i>grwd1</i>               |
| CG1234                                  |              | <i>noc3l</i>     |                            |
| CG12101                                 | <i>Hsp60</i> | <i>hspd1</i>     |                            |
| CG11738                                 |              | <i>zgc:65782</i> |                            |
| CG10565                                 |              | <i>dnajc2</i>    |                            |

|                               |         |                 |                                    |
|-------------------------------|---------|-----------------|------------------------------------|
| <i>Amino Acids metabolism</i> | CG2674  | <i>M(2)21AB</i> | <i>mat1a</i>                       |
|                               | CG32031 | <i>Argk</i>     | <i>ckma, ckmt2, ckb, zgc:56085</i> |
|                               | CG11654 | <i>Ahcy13</i>   | <i>ahcy</i>                        |
|                               | CG3267  |                 | <i>si:ch211-198n5.11, pccb</i>     |
|                               | CG4233  | <i>Got2</i>     | <i>got2b</i>                       |
|                               | CG5320  | <i>Gdh</i>      | <i>glud1a, glud1b</i>              |

|                             |         |                  |                        |
|-----------------------------|---------|------------------|------------------------|
| <i>Protein biosynthesis</i> | CG11267 |                  | <i>hspe1</i>           |
|                             | CG32409 |                  | <i>rrs1</i>            |
|                             | CG10206 | <i>nop5</i>      | <i>nop58</i>           |
|                             | CG12131 | <i>Adam</i>      | <i>zgc:55443</i>       |
|                             | CG12141 | <i>Aats-lys</i>  | <i>kars</i>            |
|                             | CG17611 | <i>eIF6</i>      | <i>itgb4bp4</i>        |
|                             | CG4008  | <i>und</i>       | <i>metap2, metap2l</i> |
|                             | CG3633  | <i>mRpS29</i>    | <i>dap3</i>            |
|                             | CG4533  | <i>l(2)efl</i>   | <i>hspb1, hspb8</i>    |
|                             | CG4859  | <i>Mmp1</i>      | <i>mmp14a</i>          |
|                             | CG5033  |                  | <i>bop1</i>            |
|                             | CG9020  |                  | <i>rars</i>            |
|                             | CG6382  | <i>Elf</i>       | <i>gspt1</i>           |
|                             | CG2173  | <i>Rs1</i>       | <i>ddx27</i>           |
|                             | CG5012  | <i>mRpL7-L12</i> | <i>mrpl12</i>          |
|                             | CG8443  |                  | <i>zgc:152873</i>      |

|  |        |              |                |
|--|--------|--------------|----------------|
|  | CG6756 | <i>Tom70</i> | <i>tomm70a</i> |
|--|--------|--------------|----------------|

|                            |        |                   |                          |
|----------------------------|--------|-------------------|--------------------------|
| <i>Transporter/carrier</i> | CG2713 | <i>ttm50</i>      | <i>tim50</i>             |
|                            | CG4994 | <i>Mpcp</i>       | <i>slc25a3, slc25a3l</i> |
|                            | CG9480 | <i>Glycogenin</i> | <i>gyg1, gygl</i>        |
|                            | CG6647 | <i>porin</i>      | <i>vdac2, vdac3</i>      |
|                            | CG7654 |                   | <i>tomm20</i>            |
|                            | CG9297 |                   | <i>LOC571928, srl</i>    |
|                            | CG4239 |                   | <i>tmem38a</i>           |

|                             |         |                |                                                         |
|-----------------------------|---------|----------------|---------------------------------------------------------|
| <i>ECM and cytoskeleton</i> | CG7178  | <i>WupA</i>    | <i>tnni2a.1, tnni2a.2, tnni2a.3, tnni2a.4, tnni2b.2</i> |
|                             | CG4843  | <i>Tm2*</i>    | <i>tpm3, tpma, tpm2</i>                                 |
|                             | CG4376  | <i>Actn*</i>   | <i>actn3a</i>                                           |
|                             | CG4027  | <i>Act5C*</i>  | <i>acta1a, acta1b, acta2</i>                            |
|                             | CG18290 | <i>Act87E*</i> | <i>acta1a, acta1b, acta2</i>                            |
|                             | CG10067 | <i>Act57B*</i> | <i>acta1a, acta1b, acta2</i>                            |
|                             | CG10504 | <i>Ilk*</i>    | <i>ilk</i>                                              |
|                             | CG18250 | <i>Dg*</i>     | <i>dag1</i>                                             |
|                             | CG1915  | <i>sls*</i>    | <i>mybpc3, ttna, ttnb, ttnl, zgc:165344</i>             |
|                             | CG31794 | <i>Pax*</i>    | <i>pxn</i>                                              |
|                             | CG7107  | <i>up*</i>     | <i>tnnt1, tnnt3a,</i>                                   |
|                             | CG33149 | <i>Mlp60A*</i> | <i>csp3</i>                                             |
|                             | CG3299  | <i>Vinc</i>    | <i>vcl</i>                                              |
|                             | CG3960  |                | <i>smtnl</i>                                            |

|                  |         |              |                        |
|------------------|---------|--------------|------------------------|
| <i>Signaling</i> | CG7223  | <i>htl*</i>  | <i>fgfr1a, fgfr1b</i>  |
|                  | CG17348 | <i>drl*</i>  | <i>met</i>             |
|                  | CG18657 | <i>NetA*</i> | <i>ntn1a</i>           |
|                  | CG4125  | <i>rst*</i>  | <i>kirrel, kirrel3</i> |
|                  | CG11255 |              | <i>adkb</i>            |
|                  | CG6148  | <i>Past1</i> | <i>ehd1</i>            |
|                  | CG7981  | <i>troi</i>  | <i>hspg2, sid4</i>     |
|                  | CG8556  | <i>Rac2</i>  | <i>rac3</i>            |
|                  | CG9811  | <i>Rgk1</i>  | <i>rem1</i>            |

|                  |         |                      |                                    |
|------------------|---------|----------------------|------------------------------------|
| <i>Not known</i> | CG9131  | <i>kisir</i>         | <i>slmo2</i>                       |
|                  | CG11444 |                      | <i>pdap1</i>                       |
|                  | CG1430  | <i>bys</i>           | <i>bysl</i>                        |
|                  | CG11158 |                      | <i>si:dkey-98p3.7</i>              |
|                  | CG14786 |                      | <i>lrpprc</i>                      |
|                  | CG17041 |                      | <i>ldb3a, ldb3b,<br/>zgc:56116</i> |
|                  | CG4405  | <i>jp</i>            | <i>jph2</i>                        |
|                  | CG5886  |                      | <i>si:dkey-34f16.1</i>             |
|                  | CG6724  |                      | <i>wdr12</i>                       |
|                  | CG7519  |                      | <i>zgc:92611</i>                   |
|                  | CG7638  |                      | <i>tmem161a</i>                    |
|                  | CG7993  |                      | <i>bxdc1</i>                       |
|                  | CG8461  |                      | <i>si:dkey-<br/>236e20.6</i>       |
|                  | CG6455  | <i>Motor-protein</i> | <i>immt</i>                        |
|                  | CG6459  |                      | <i>zgc:110137</i>                  |

**Genes expressed in *Drosophila* muscles**

| CG number | Gene name        | Zebrafish orthologue                                    | Zebrafish expression |
|-----------|------------------|---------------------------------------------------------|----------------------|
| CG10160   | <i>ImpL3</i>     | <i>ldhb, ldha</i>                                       | muscular             |
| CG10067   | <i>Act57B</i>    | <i>acta1a, acta1b, acta2</i>                            | muscular             |
| CG10922   | <i>La</i>        | <i>ssb</i>                                              | muscular             |
| CG11267   |                  | <i>hspe1</i>                                            | muscular             |
| CG11444   |                  | <i>pdap1</i>                                            | muscular             |
| CG1429    | <i>Mef2</i>      | <i>mef2a, mef2ca</i>                                    | muscular             |
| CG1430    | <i>bys</i>       | <i>bysl</i>                                             | muscular             |
| CG1721    | <i>Pglym78</i>   | <i>pgam2</i>                                            | muscular             |
| CG18290   | <i>Act87E</i>    | <i>acta1a, acta1b, acta2</i>                            | muscular             |
| CG2674    | <i>M(2)21AB</i>  | <i>mat1a</i>                                            | muscular             |
| CG2713    | <i>ttn50</i>     | <i>timm50</i>                                           | muscular             |
| CG32031   | <i>Argk</i>      | <i>ckma, ckmt2, ckb, zgc:56085</i>                      | muscular             |
| CG32409   |                  | <i>rrs1</i>                                             | muscular             |
| CG3725    | <i>Ca-P60A</i>   | <i>atp2a1, atp2a2a</i>                                  | muscular             |
| CG4376    | <i>Actn</i>      | <i>actn3a</i>                                           | muscular             |
| CG4843    | <i>Tm2</i>       | <i>tpm3, tpma, tpm2</i>                                 | muscular             |
| CG5170    | <i>Dp1</i>       | <i>hdlbp, wu:fa07b03</i>                                | muscular             |
| CG5330    | <i>Nap1</i>      | <i>nap1l1, nap1l4a</i>                                  | muscular             |
| CG6022    | <i>Cchl</i>      | <i>hccs</i>                                             | muscular             |
| CG6756    | <i>Tom70</i>     | <i>tomm70a</i>                                          | muscular             |
| CG6937    |                  | <i>mki67ip</i>                                          | muscular             |
| CG7178    | <i>WupA</i>      | <i>tnni2a.1, tnni2a.2, tnni2a.3, tnni2a.4, tnni2b.2</i> | muscular             |
| CG7361    | <i>RFeSP</i>     | <i>uqcrfs1</i>                                          | muscular             |
| CG7430    |                  | <i>dldh</i>                                             | muscular             |
| CG7998    |                  | <i>zgc:64133</i>                                        | muscular             |
| CG8251    | <i>Pgi</i>       | <i>gpia</i>                                             | muscular             |
| CG9131    | <i>kisir</i>     | <i>slmo2</i>                                            | muscular             |
| CG4027    | <i>Act5C</i>     | <i>acta1a, acta1b, acta2</i>                            | muscular             |
| CG10120   | <i>Men</i>       | <i>me2, me3</i>                                         | muscular             |
| CG10206   | <i>nop5</i>      | <i>nop58</i>                                            | muscular             |
| CG10504   | <i>Ilk</i>       | <i>ilk</i>                                              | muscular             |
| CG10565   |                  | <i>dnajc2</i>                                           | muscular             |
| CG10664   |                  | <i>cox4i1</i>                                           | muscular             |
| CG11158   |                  | <i>si:dkey-98p3.7</i>                                   | muscular             |
| CG11255   |                  | <i>adkb</i>                                             | muscular             |
| CG11654   | <i>Ahcy13</i>    | <i>ahcy</i>                                             | muscular             |
| CG11738   |                  | <i>zgc:65782</i>                                        | muscular             |
| CG11876   |                  | <i>pdhb</i>                                             | muscular             |
| CG12055   | <i>Gapdh1</i>    | <i>gapdh</i>                                            | muscular             |
| CG12131   | <i>Adam</i>      | <i>zgc:55443</i>                                        | muscular             |
| CG12141   | <i>Aats-lys</i>  | <i>kars</i>                                             | muscular             |
| CG12233   | <i>I(1)G0156</i> | <i>idh3a</i>                                            | muscular             |
| CG1234    |                  | <i>noc3l</i>                                            | muscular             |
| CG12792   | <i>I(2)09851</i> | <i>grwd1</i>                                            | muscular             |
| CG1416    |                  | <i>ahsa1</i>                                            | muscular             |
| CG14786   |                  | <i>lrpprc</i>                                           | muscular             |
| CG17041   |                  | <i>ldb3a, ldb3b, zgc:56116</i>                          | muscular             |
| CG17246   | <i>Scs-fp</i>    | <i>sdha</i>                                             | muscular             |
| CG17280   | <i>levy</i>      | <i>cox6a1</i>                                           | muscular             |

|         |                      |                                             |          |
|---------|----------------------|---------------------------------------------|----------|
| CG17348 | <i>drl</i>           | <i>met</i>                                  | muscular |
| CG1746  |                      | <i>atp5g</i>                                | muscular |
| CG1746  |                      | <i>zgc:73293</i>                            | muscular |
| CG17611 | <i>eIF6</i>          | <i>itgb4bp4</i>                             | muscular |
| CG18250 | <i>Dg</i>            | <i>dag1</i>                                 | muscular |
| CG18657 | <i>NetA</i>          | <i>ntn1a</i>                                | muscular |
| CG1897  | <i>Msh</i>           | <i>msxe</i>                                 | muscular |
| CG1915  | <i>sls</i>           | <i>mybpc3, ttna, ttnb, ttnl, zgc:165344</i> | muscular |
| CG2171  | <i>Tpi</i>           | <i>tpi1b</i>                                | muscular |
| CG2968  |                      | <i>atp5d</i>                                | muscular |
| CG3001  | <i>Hex-A</i>         | <i>zgc:55926</i>                            | muscular |
| CG31045 | <i>Mhcl</i>          | <i>myo18l1</i>                              | muscular |
| CG31692 | <i>fbp</i>           | <i>fbp2</i>                                 | muscular |
| CG31794 | <i>Pax</i>           | <i>pxn</i>                                  | muscular |
| CG3249  | <i>yu</i>            | <i>akap1b</i>                               | muscular |
| CG3267  |                      | <i>si:ch211-198n5.11, pccb</i>              | muscular |
| CG3283  | <i>SdhB</i>          | <i>sdhb</i>                                 | muscular |
| CG3299  | <i>Vinc</i>          | <i>vcl</i>                                  | muscular |
| CG33149 | <i>Mlp60A</i>        | <i>csrp3</i>                                | muscular |
| CG3633  | <i>mRpS29</i>        | <i>dap3</i>                                 | muscular |
| CG3683  |                      | <i>ndufa8</i>                               | muscular |
| CG3800  |                      | <i>zff9</i>                                 | muscular |
| CG3960  |                      | <i>smtnl</i>                                | muscular |
| CG4001  | <i>Pfk</i>           | <i>pfkma</i>                                | muscular |
| CG4008  | <i>und</i>           | <i>metap2, metap2l</i>                      | muscular |
| CG4033  | <i>Rpl135</i>        | <i>zgc:66298</i>                            | muscular |
| CG4125  | <i>rst</i>           | <i>kirrel, kirrel3</i>                      | muscular |
| CG4233  |                      | <i>got2b</i>                                | muscular |
| CG4239  |                      | <i>tmem38a</i>                              | muscular |
| CG4307  | <i>Oscp</i>          | <i>atp5o</i>                                | muscular |
| CG4405  | <i>jp</i>            | <i>jph2</i>                                 | muscular |
| CG4533  | <i>l(2)efl</i>       | <i>hspb1, hspb8</i>                         | muscular |
| CG4769  |                      | <i>cyc1</i>                                 | muscular |
| CG4859  | <i>Mmp1</i>          | <i>mmp14a</i>                               | muscular |
| CG4882  |                      | <i>zgc:100970</i>                           | muscular |
| CG4994  | <i>Mpcp</i>          | <i>slc25a3, slc25a3l</i>                    | muscular |
| CG5012  | <i>mRpL7-L12</i>     | <i>mrpl12</i>                               | muscular |
| CG5033  |                      | <i>bop1</i>                                 | muscular |
| CG5258  | <i>NHP2</i>          | <i>nhp2</i>                                 | muscular |
| CG5320  | <i>Gdh</i>           | <i>glud1a, glud1b</i>                       | muscular |
| CG5441  | <i>dei</i>           | <i>mespa, mespb</i>                         | muscular |
| CG5525  |                      | <i>cct4</i>                                 | muscular |
| CG5596  | <i>Mlc1</i>          | <i>zgc:77231, mylz3, zgc:66286</i>          | muscular |
| CG5886  |                      | <i>si:dkey-34f16.1</i>                      | muscular |
| CG6020  |                      | <i>ndufa9</i>                               | muscular |
| CG6030  | <i>ATPsyn-d</i>      | <i>atp5h</i>                                | muscular |
| CG6148  | <i>Past1</i>         | <i>ehd1</i>                                 | muscular |
| CG6343  | <i>ND42</i>          | <i>ndufa10</i>                              | muscular |
| CG6375  | <i>pit</i>           | <i>ddx18, pit</i>                           | muscular |
| CG6382  | <i>Elf</i>           | <i>gspt1</i>                                | muscular |
| CG6455  | <i>Motor-protein</i> | <i>immt</i>                                 | muscular |
| CG6459  |                      | <i>zgc:110137</i>                           | muscular |

|         |                        |                                        |               |
|---------|------------------------|----------------------------------------|---------------|
| CG6647  | <i>porin</i>           | <i>vdac2, vdac3</i>                    | muscular      |
| CG6724  |                        | <i>wdr12</i>                           | muscular      |
| CG6767  |                        | <i>prps1a</i>                          | muscular      |
| CG7006  |                        | <i>nip7</i>                            | muscular      |
| CG7070  | <i>PyK</i>             | <i>pkm2b</i>                           | muscular      |
| CG7107  | <i>up</i>              | <i>tnnt1, tnnt3a, tnnt3b</i>           | muscular      |
| CG7223  | <i>htl</i>             | <i>fgfr1a, fgfr1b</i>                  | muscular      |
| CG7254  | <i>GlyP</i>            | <i>pygma</i>                           | muscular      |
| CG7356  |                        | <i>tgm2</i>                            | muscular      |
| CG7519  |                        | <i>zgc:92611</i>                       | muscular      |
| CG7638  |                        | <i>tmem161a</i>                        | muscular      |
| CG7654  |                        | <i>tomm20</i>                          | muscular      |
| CG7981  | <i>trol</i>            | <i>hspg2</i>                           | muscular      |
| CG7981  | <i>trol</i>            | <i>sid4</i>                            | muscular      |
| CG7993  |                        | <i>bxdc1</i>                           | muscular      |
| CG8353  |                        | <i>zgc:103586</i>                      | muscular      |
| CG8443  |                        | <i>zgc:152873</i>                      | muscular      |
| CG8461  |                        | <i>si:dkey-236e20.6</i>                | muscular      |
| CG8542  | <i>Hsc70-5</i>         | <i>hspa9b</i>                          | muscular      |
| CG8556  | <i>Rac2</i>            | <i>rac3</i>                            | muscular      |
| CG9020  |                        | <i>rars</i>                            | muscular      |
| CG9140  |                        | <i>ndufv1</i>                          | muscular      |
| CG9297  |                        | <i>LOC571928, srl</i>                  | muscular      |
| CG9480  | <i>Glycogenin</i>      | <i>gyg1, gygl</i>                      | muscular      |
| CG9809  |                        | <i>ppargc1a, ppargc1b</i>              | muscular      |
| CG9811  | <i>Rgk1</i>            | <i>rem1</i>                            | muscular      |
| CG2173  | <i>Rs1</i>             | <i>ddx27</i>                           | muscular      |
| CG12101 | <i>Hsp60</i>           | <i>hspd1</i>                           | muscular      |
| CG8545  |                        | <i>im:6893299</i>                      | muscular      |
| CG6388  |                        | <i>im:7150454</i>                      | muscular      |
| CG17334 | <i>lin-28</i>          | <i>lin28</i>                           | muscular      |
| CG8376  | <i>ap</i>              | <i>lhx2, lhx9</i>                      | not in muscle |
| CG2098  | <i>ferrochelataase</i> | <i>fech</i>                            | not in muscle |
| CG11372 | <i>galectin</i>        | <i>lgals2a, lgals2b, lgals9l1</i>      | not in muscle |
| CG6992  | <i>Glu-RIIA</i>        | <i>si:ch211-251b21.1, LOC100151589</i> | not in muscle |
| CG2718  | <i>Gs1</i>             | <i>glula, glulb</i>                    | not in muscle |
| CG1787  | <i>Hexo2</i>           | <i>hexa, zgc:112084</i>                | not in muscle |
| CG10145 | <i>mspo</i>            | <i>spon2a, spon2b</i>                  | not in muscle |
| CG9256  | <i>NHE2</i>            | <i>slc9a2, slc9a3.1, slc9a3.2</i>      | not in muscle |
| CG2863  | <i>Nle</i>             | <i>zgc:110281</i>                      | not in muscle |
| CG3460  | <i>Nmd3</i>            | <i>nmd3</i>                            | not in muscle |
| CG3593  | <i>r-1</i>             | <i>zgc:55702</i>                       | not in muscle |
| CG1250  | <i>sec23</i>           | <i>sec23a, sec23b</i>                  | not in muscle |
| CG6725  | <i>Sulf1</i>           | <i>sulf1, sulf2</i>                    | not in muscle |
| CG10327 | <i>TBPH</i>            | <i>tardbp, tardbpl</i>                 | not in muscle |
| CG8186  | <i>Vha36</i>           | <i>atp6v1d</i>                         | not in muscle |
| CG18593 | <i>viaf1</i>           | <i>pdcl3</i>                           | not in muscle |
| CG4170  | <i>vig</i>             | <i>zgc:103482</i>                      | not in muscle |
| CG7433  |                        | <i>abat</i>                            | not in muscle |
| CG1444  |                        | <i>hsd17b12a, hsd17b12b</i>            | not in muscle |
| CG1893  | <i>scramb2</i>         | <i>zgc:77051</i>                       | not in muscle |
| CG8058  |                        | <i>abhd3</i>                           | not in muscle |

|         |            |                                       |               |
|---------|------------|---------------------------------------|---------------|
| CG6778  |            | si:dkey-276i5.1                       | not in muscle |
| CG4065  |            | mak10                                 | not in muscle |
| CG6543  |            | echs1                                 | not in muscle |
| CG11811 |            | guk1, zgc:86776                       | not in muscle |
| CG5061  |            | cap1                                  | not in muscle |
| CG10724 |            | wrd1                                  | not in muscle |
| CG1814  |            | nt5dc2                                | not in muscle |
| CG9296  |            | pde6d, PDE6D                          | not in muscle |
| CG11658 |            | fbxo25, fbxo32                        | not in muscle |
| CG8888  |            | rdh1,rdh1l, rdh5, hsd11b2             | not in muscle |
| CG4654  | Dp         | tfdp1, tfdp2                          | not in muscle |
| CG8107  | CalpB      | capn1a, capn2b,capn2l, capn3, capn9   | not in muscle |
| CG4427  | EP2237     | klf11a, klf11b, LOC793794             | not described |
| CG8933  | exd        | pbx2, pbx3, pbx4, zgc:158824          | not described |
| CG2096  | flw        | ppp1cb                                | not described |
| CG3903  | Gli        | cel.1, cel.2, ces2, ces3              | not described |
| CG2679  | gol        | zgc:92168, rnf128                     | not described |
| CG2835  | G-salpa60A | GNAL (1 of 2), gnal, zgc:92392        | not described |
| CG31043 | gukh       | nhsl1b, NHS (1 of 2), NHS (2 of 2)    | not described |
| CG7269  | Hel25E     | ddx39a, ddx39b, bat1                  | not described |
| CG5277  | lp259      | zgc:56334                             | not described |
| CG9403  | jing       | aebp2                                 | not described |
| CG5433  | Klc        | KLC4, zgc:66299, zgc:153164           | not described |
| CG5405  | KrT95D     | pacs1, pacs2                          | not described |
| CG6105  | l(2)06225  | atp5l                                 | not described |
| CG10655 | l(2)37Bb   | FOXRED1                               | not described |
| CG10691 | l(2)37Cc   | pdhb                                  | not described |
| CG5504  | l(2)tid    | dnaja3a, dnaja3b                      | not described |
| CG1715  | l(3)03670  | CHCHD6 (2 of 2), chchd3               | not described |
| CG5824  | l(3)07882  | NOP14                                 | not described |
| CG9762  | l(3)neo18  | ndufb5                                | not described |
| CG14066 | larp       | larp1, wu:fc76b04                     | not described |
| CG31426 | ligatin    | lgtn                                  | not described |
| CG7279  | Lip1       | lipf                                  | not described |
| CG4677  | lmd        | glis3                                 | not described |
| CG32171 | Lmpt       | fhla, fh12b, fh13                     | not described |
| CG4746  | mab-2      | mab211l, mab2112                      | not described |
| CG10379 | mbc        | dock1, dock3, dock5                   | not described |
| CG32156 | Mbs        | ppp1r12a, mypt2                       | not described |
| CG14981 | mge        | tomm22                                | not described |
| CG33208 | MICAL      | mical3, zgc:171928; si:dkey-153k10.11 | not described |
| CG14080 | Mkp3       | dup6, dup7                            | not described |
| CG12005 | Mms19      | LOC563643                             | not described |
| CG4696  | Mp20       | cnn3a, tagln3, ccn2                   | not described |
| CG14048 | mRpL14     | mrpl14                                | not described |
| CG3109  | mRpL16     | zgc:91951                             | not described |
| CG8039  | mRpL19     | mrpl19                                | not described |
| CG7636  | mRpL2      | im:6908224                            | not described |
| CG4742  | mRpL22     | zgc:171911                            | not described |
| CG5242  | mRpL22-L24 | zgc:103495                            | not described |
| CG1320  | mRpL23     | mrpl23                                | not described |

|         |                    |                                                       |               |
|---------|--------------------|-------------------------------------------------------|---------------|
| CG8849  | <i>mRpL24</i>      | <i>mrpl24</i>                                         | not described |
| CG6949  | <i>mRpL45</i>      | <i>mrpl45</i>                                         | not described |
| CG13922 | <i>mRpL46</i>      | <i>zgc:92810</i>                                      | not described |
| CG17642 | <i>mRpL48</i>      | <i>mrpl48</i>                                         | not described |
| CG17166 | <i>mRpL5</i>       | <i>mrpl39</i>                                         | not described |
| CG31478 | <i>mRpL9</i>       | <i>mrpl9</i>                                          | not described |
| CG5479  | <i>mRpL-CI-B8</i>  | <i>MRPL43</i>                                         | not described |
| CG4247  | <i>mRpS10</i>      | <i>si:ch211-51e12.6</i>                               | not described |
| CG7354  | <i>mRpS26</i>      | <i>zgc:92670</i>                                      | not described |
| CG8470  | <i>mRpS30</i>      | <i>zgc:163093</i>                                     | not described |
| CG5904  | <i>mRpS31</i>      | <i>mrps31</i>                                         | not described |
| CG7935  | <i>msk</i>         | <i>si:ch211-116i17.1, ipo7</i>                        | not described |
| CG33549 | <i>Msp-300</i>     | <i>syne1a, syne2a, syne2b</i>                         | not described |
| CG6851  | <i>Mtch</i>        | <i>mtch2</i>                                          | not described |
| CG3743  | <i>MTF-1</i>       | <i>ZNF76 (1 of 2), zgc:153635, znf143, zgc:101653</i> | not described |
| CG8759  | <i>Nacalpa</i>     | <i>NACAD, naca</i>                                    | not described |
| CG3944  | <i>ND23</i>        | <i>ndufs8, zgc:109991</i>                             | not described |
| CG2286  | <i>ND75</i>        | <i>ndufs1</i>                                         | not described |
| CG10009 | <i>Noa36</i>       | <i>znf330</i>                                         | not described |
| CG7421  | <i>Nopp140</i>     | <i>nolc1l</i>                                         | not described |
| CG12752 | <i>Nxt1</i>        | <i>nxt2</i>                                           | not described |
| CG7393  | <i>p38b</i>        | <i>mapk14, mpk14</i>                                  | not described |
| CG11139 | <i>p47</i>         | <i>nsfl1c</i>                                         | not described |
| CG13072 | <i>PDCD-5</i>      | <i>pdcd5</i>                                          | not described |
| CG2087  | <i>PEK</i>         | <i>EIF2AK3</i>                                        | not described |
| CG3127  | <i>Pgk</i>         | <i>pgk1</i>                                           | not described |
| CG31022 | <i>PH4alphaEFB</i> | <i>p4ha1, p4ha2</i>                                   | not described |
| CG4003  | <i>pont</i>        | <i>ruvbl1</i>                                         | not described |
| CG9952  | <i>ppa</i>         | <i>fbxl14, fbxl14a</i>                                | not described |
| CG8402  | <i>PpD3</i>        | <i>zgc:110801</i>                                     | not described |
| CG3422  | <i>Pros28.1</i>    | <i>psma8</i>                                          | not described |
| CG7413  | <i>Rbf</i>         | <i>rb1, rbl1</i>                                      | not described |
| CG2161  | <i>Rga</i>         | <i>zgc:162316</i>                                     | not described |
| CG16788 | <i>RnpS1</i>       | <i>RNPS1</i>                                          | not described |
| CG6155  | <i>Roe1</i>        | <i>grpel1, LOC100004941</i>                           | not described |
| CG32096 | <i>rols</i>        | <i>tanc2, LOC561438</i>                               | not described |
| CG11979 | <i>Rpb5</i>        | <i>polr2e</i>                                         | not described |
| CG4863  | <i>RpL3</i>        | <i>rpl3</i>                                           | not described |
| CG18174 | <i>Rpn11</i>       | <i>zgc:162272</i>                                     | not described |
| CG11271 | <i>RpS12</i>       | <i>rps12</i>                                          | not described |
| CG4202  | <i>Sas10</i>       | <i>zgc:92127</i>                                      | not described |
| CG1891  | <i>sax</i>         | <i>acvrl1</i>                                         | not described |
| CG5186  | <i>slim</i>        | <i>klhdc10</i>                                        | not described |
| CG4551  | <i>smi35A</i>      | <i>LOC564976</i>                                      | not described |
| CG8749  | <i>snRNP70K</i>    | <i>snrnp70</i>                                        | not described |
| CG8978  | <i>Sop2</i>        | <i>arpc1a, arpc1b</i>                                 | not described |
| CG10121 | <i>SP1173</i>      | <i>zgc:101042</i>                                     | not described |
| CG1539  | <i>spdo</i>        | <i>tmod2, tmod4</i>                                   | not described |
| CG4086  | <i>Su(P)</i>       | <i>ptgesl</i>                                         | not described |
| CG6476  | <i>Su(var)3-9</i>  | <i>suv39h1a, suv39h1b, eif2s3</i>                     | not described |
| CG5374  | <i>T-cp1</i>       | <i>tcp1</i>                                           | not described |
| CG4217  | <i>TFAM</i>        | <i>zgc:153358</i>                                     | not described |

|         |            |                                               |               |
|---------|------------|-----------------------------------------------|---------------|
|         |            |                                               | not described |
| CG12157 | Tom40      | tomm40, tomm40l                               | not described |
| CG3171  | Tre1       | mtnr1aa, mtnr1ba, mtnr1c,<br>mtnr1bb, mtnr1al | not described |
| CG9364  | Treh       | LOC795901                                     | not described |
| CG5486  | Ubp64E     | usp40                                         | not described |
| CG17932 | Ugt36Bc    | zgc:153113, zgc:136978                        | not described |
| CG31332 | unc-115    | zgc:158673, EPB49, ABLIM2                     | not described |
| CG3572  | vimar      | LOC100007961                                  | not described |
| CG17437 | wds        | wdr5                                          | not described |
| CG3278  | Tif-IA     | im:6893790                                    | not described |
| CG8231  | Tcp-1zeta  | cct6a                                         | not described |
| CG6751  |            | pwp1                                          | not described |
| CG11652 |            | zgc:110702                                    | not described |
| CG7915  | Ect4       | sarm1                                         | not described |
| CG4798  | l(2)k01209 | uckl1                                         | not described |
| CG4692  |            | LOC402883                                     | not described |
| CG5590  |            | hndl2                                         | not described |
| CG33097 |            | tcerg1                                        | not described |
| CG9005  |            | si:dkey-266j9.3                               | not described |
| CG11015 |            | zgc:86599, zgc:153978                         | not described |
| CG4532  | pod1       | zgc:112352                                    | not described |
| CG13298 |            | sf3b14                                        | not described |
| CG6512  |            | si:ch211-12e1.4                               | not described |
| CG10627 |            | pgm3                                          | not described |
| CG14206 | RpS10b     | rps10                                         | not described |
| CG15433 | Elp3       | elp3                                          | not described |
| CG4567  |            | zgc:154041                                    | not described |
| CG8636  |            | eif3g                                         | not described |
| CG1475  | RpL13A     | rpl13a                                        | not described |
| CG32486 |            | zgc:153061                                    | not described |
| CG1785  |            | zgc:123178                                    | not described |
| CG33009 |            | zgc:103473                                    | not described |
| CG32920 |            | zgc:56596                                     | not described |
| CG9743  |            | scd, scdb                                     | not described |
| CG10341 |            | si:dkey-22l11.5                               | not described |
| CG7182  |            | hspa14                                        | not described |
| CG9253  |            | DDX47                                         | not described |
| CG7987  |            | zgc:194215                                    | not described |
| CG5558  |            | zgc:77183                                     | not described |
| CG5728  |            | pdcd11                                        | not described |
| CG6904  |            | gys1, gys2                                    | not described |
| CG9300  |            | zgc:109901                                    | not described |
| CG1598  |            | asna1                                         | not described |
| CG14447 |            | grip1, si:ch73-250d21.1                       | not described |
| CG8531  |            | dnajc11                                       | not described |
| CG5800  |            | ddx10                                         | not described |
| CG5641  |            | ilf2                                          | not described |
| CG12909 |            | zgc:65749                                     | not described |
| CG4901  |            | NP_001093527.2                                | not described |
| CG8258  |            | cct8                                          | not described |
| CG1542  |            | ebna1bp2l                                     | not described |
| CG33505 |            | rnu3ip2                                       | not described |

|         |              |                                    |               |
|---------|--------------|------------------------------------|---------------|
| CG7712  |              | ndufa6                             | not described |
| CG7823  |              | <i>arhgdig, arhgdia</i>            | not described |
| CG5537  |              | zgc:77421                          | not described |
| CG6766  |              | zgc:55819                          | not described |
| CG4552  |              | tbc1d23                            | not described |
| CG30349 |              | wdr43                              | not described |
| CG7071  |              | tmem199                            | not described |
| CG40049 | <i>mRpS5</i> | zgc:153680                         | not described |
| CG32253 |              | bxdc2                              | not described |
| CG9246  |              | noc2l                              | not described |
| CG11857 |              | <i>rer1</i>                        | not described |
| CG6028  |              | zgc:85683                          | not described |
| CG17593 |              | <i>ccdc47</i>                      | not described |
| CG9630  |              | ddx55                              | not described |
| CG8635  |              | zc3h15                             | not described |
| CG33713 |              | acbd6                              | not described |
| CG33714 |              | C14orf156                          | not described |
| CG11151 |              | <i>zgc:101621, C20orf79</i>        | not described |
| CG33502 |              | <i>zgc:110319, hirp5</i>           | not described |
| CG7989  |              | zgc:153384                         | not described |
| CG10286 |              | heatr3                             | not described |
| CG13900 |              | sf3b3                              | not described |
| CG10075 |              | zgc:153206                         | not described |
| CG13850 |              | <i>LOC562388, im:7147223</i>       | not described |
| CG2263  |              | farsa                              | not described |
| CG7718  |              | LOC561577                          | not described |
| CG17492 |              | <i>MIB2</i>                        | not described |
| CG4169  |              | uqcrc2, zgc:92453                  | not described |
| CG4300  |              | <i>sms</i>                         | not described |
| CG13185 |              | <i>mdn1</i>                        | not described |
| CG1671  |              | zgc:101778                         | not described |
| CG12785 |              | nol6                               | not described |
| CG12203 |              | ndufs4                             | not described |
| CG9663  |              | <i>A2BFT1, zgc:16197, abcg4b</i>   | not described |
| CG4679  |              | ptcd3                              | not described |
| CG9306  |              | ndufb9                             | not described |
| CG8798  |              | lonp1                              | not described |
| CG7033  |              | CCT2                               | not described |
| CG1371  |              | LOC570617                          | not described |
| CG12091 |              | <i>pptc7, B8A5W0</i>               | not described |
| CG10535 |              | <i>ikbkapl</i>                     | not described |
| CG11188 |              | aatf                               | not described |
| CG3861  |              | cs                                 | not described |
| CG3394  |              | slc27a1, zgc:153860,<br>zgc:112138 | not described |
| CG1354  |              | <i>ola1</i>                        | not described |
| CG9416  |              | ERPM1                              | not described |
| CG4069  |              | klhdc4                             | not described |
| CG9172  |              | ENSDARG00000074552                 |               |
| CG2656  |              | gpn3                               | not described |
| CG6769  |              | znf622                             | not described |
| CG32344 |              | <i>ddx54</i>                       | not described |
| CG6666  |              | <i>sdhc</i>                        | not described |

|         |  |                                        |               |
|---------|--|----------------------------------------|---------------|
| CG3434  |  | qtrtd1                                 | not described |
| CG7839  |  | <i>zgc:112104, B8JLT6</i>              | not described |
| CG9588  |  | <i>zgc:92643</i>                       | not described |
| CG6563  |  | <i>prmt3</i>                           | not described |
| CG8414  |  | NOL9                                   | not described |
| CG11455 |  | ndufs5                                 | not described |
| CG2221  |  | <i>NP 001139777.1, ASWUF6</i>          | not described |
| CG6439  |  | <i>zgc:86647</i>                       | not described |
| CG14270 |  | <i>zgc:110046</i>                      | not described |
| CG13126 |  | LOC565824                              | not described |
| CG31873 |  | agk                                    | not described |
| CG11887 |  | si:dkey-190I1.1                        | not described |
| CG5220  |  | <i>ftsj1</i>                           | not described |
| CG7834  |  | <i>etfb</i>                            | not described |
| CG14207 |  | hspb3                                  | not described |
| CG12151 |  | <i>pdp2, zgc:174908</i>                | not described |
| CG14122 |  | <i>smynd4</i>                          | not described |
| CG3731  |  | pmpcb, uqrc1                           | not described |
| CG1074  |  | trmt11                                 | not described |
| CG17084 |  | gpr157                                 | not described |
| CG12006 |  | <i>zgc:63658</i>                       | not described |
| CG11980 |  | C12orf10                               | not described |
| CG9596  |  | <i>zgc:123193</i>                      | not described |
| CG8446  |  | <i>zgc:152851</i>                      | not described |
| CG5037  |  | Q08C12_DANRE                           | not described |
| CG5903  |  | <i>zgc:110800, zgc:123314, apoob</i>   | not described |
| CG13993 |  | pfdn1                                  | not described |
| CG4038  |  | nola1                                  | not described |
| CG6412  |  | <i>zgc:158429</i>                      | not described |
| CG7277  |  | <i>zgc:153379</i>                      | not described |
| CG12797 |  | <i>ciao1, wsb1</i>                     | not described |
| CG31100 |  | <i>slc2a8l, BOUXQ2</i>                 | not described |
| CG11837 |  | <i>zgc:101122</i>                      | not described |
| CG8417  |  | <i>zgc:110773</i>                      | not described |
| CG33138 |  | <i>GBE1 (1 of 2), GBE1 (2 of 2)</i>    | not described |
| CG9281  |  | <i>abcf2, LOC100000576</i>             | not described |
| CG8974  |  | <i>zgc:73070, LOC793536</i>            | not described |
| CG4908  |  | bcs1l                                  | not described |
| CG5660  |  | <i>vars, vars2</i>                     | not described |
| CG2246  |  | prpsap2, <i>zgc:91845</i>              | not described |
| CG8029  |  | atp6ap1, A7MBP9                        | not described |
| CG1381  |  | <i>zgc:110388</i>                      | not described |
| CG15117 |  | A5WW06,<br>ENSDARG00000075319          | not described |
| CG5241  |  | NP_001094423.1                         | not described |
| CG8991  |  | <i>SOBPA, si:ch211-152c2.4</i>         | not described |
| CG7048  |  | pfdn5                                  | not described |
| CG11474 |  | <i>zgc:110816</i>                      | not described |
| CG13424 |  | hmx1                                   | not described |
| CG4893  |  | LOC559490, TPPP, tppp3                 | not described |
| CG9836  |  | <i>zgc:110331, si:ch211-191d15.2</i>   | not described |
| CG10641 |  | si:dkey-72114.9, si:ch211-<br>281124.1 | not described |
| CG3902  |  | <i>ACADSB (2 of 2), zgc:162918</i>     | not described |

|         |          |                                              |               |
|---------|----------|----------------------------------------------|---------------|
| CG2010  |          | NP_001091661.1                               | not described |
| CG3850  |          | LOC568488, GLIS2 (2 of 2)                    | not described |
| CG4420  |          | ddi2                                         | not described |
| CG9194  |          | KCNK18                                       | not described |
| CG11617 |          | MKX (2 of 2), mkxa                           | not described |
| CG5023  |          | cnn2, cnn3a, cnn3b, tagln2,<br>tagln, tagln3 | not described |
| CG31999 |          | fbln1, fbln2                                 | not described |
| CG8430  |          | zgc:152691, got1                             | not described |
| CG10479 |          | zgc:101809, blnk                             | not described |
| CG8776  |          | NP_001122216.1                               | not described |
| CG3376  |          | A8WGB5                                       | not described |
| CG32549 |          | nt5c211, nt5c2a, nt5c2b                      | not described |
| CG14222 |          | nat5                                         | not described |
| CG4827  |          | nt5e                                         | not described |
| CG1572  |          | si:dkey-11p23.3                              | not described |
| CG9710  |          | nudc                                         | not described |
| CG3542  |          | prpf40a                                      | not described |
| CG10361 |          | gcat                                         | not described |
| CG4945  |          | bsk146, zgc:172086                           | not described |
| CG8713  |          | KCNK18                                       | not described |
| CG7461  |          | acadvl                                       | not described |
| CG9426  |          | zgc:171487                                   | not described |
| CG11523 |          | zgc:55683                                    | not described |
| CG9779  |          | vps24                                        | not described |
| CG6017  |          | zdhhc13, NP_001121854.1                      | not described |
| CG10428 |          | zgc:110248                                   | not described |
| CG1776  |          | mylk2, mylk3, mylk4                          | not described |
| CG15105 |          | trimb3, zgc:113099                           | not described |
| CG6106  |          | zgc:103559                                   | not described |
| CG10610 | ECSIT    | ecsit                                        | not described |
| CG11217 | CanB2    | zgc:92169, PPP3R2 (2 of 2)                   | not described |
| CG11417 |          | zgc:66241                                    | not described |
| CG11471 | Aats-ile | iars                                         | not described |
| CG12135 | c12.1    | zgc:86607                                    | not described |
| CG12530 | Cdc42    | cdc42, cdc42l, cdc42l2                       | not described |
| CG13348 | Aats-phe | zgc:173439                                   | not described |
| CG13377 |          | zgc:113142, zgc:163053                       | not described |
| CG14622 | DAAM     | daam1, daam1l, daam2                         | not described |
| CG14996 | Chd64    | cnn2, cnn3a, cnn3b, tagln2,<br>tagln, tagln3 | not described |
| CG17158 | cpb      | CAPZB                                        | not described |
| CG2210  | awd      | nme2, nme2l, ndpkz2, ndpkz3                  | not described |
| CG3140  | Adk2     | ak2                                          | not described |
| CG31732 | yuri     | RB1CC1                                       | not described |
| CG3265  | Eb1      | mapre1, mapre1l                              | not described |
| CG33071 |          | acbd6                                        | not described |
| CG3365  | drongo   | agfg1a, agfg1b                               | not described |
| CG3644  | bic      | btf3, btf3l4                                 | not described |
| CG4051  | egl      | zgc:154068                                   | not described |
| CG4886  | cyp33    | ppie                                         | not described |
| CG5254  |          | slc25a21                                     | not described |
| CG5268  | blp      | zgc:73356                                    | not described |
| CG5353  | Aats-thr | zgc:92586                                    | not described |

|         |                     |                                |               |
|---------|---------------------|--------------------------------|---------------|
| CG5594  |                     | im:7162646, SLC12A7 (1 of 2)   | not described |
| CG5992  | <i>Adgf-A</i>       | <i>cecr1a, cecr1b</i>          | not described |
| CG7115  |                     | <i>zgc:154091, zgc:153235</i>  | not described |
| CG7516  |                     | <i>nol10</i>                   | not described |
| CG7610  | <i>ATPsyn-gamma</i> | <i>atp5c1</i>                  | not described |
| CG7902  | <i>bap</i>          | <i>nkx3.2, zgc:113257</i>      | not described |
| CG8049  | <i>Btk29A</i>       | <i>itk, btk</i>                | not described |
| CG8173  |                     | <i>pbk</i>                     | not described |
| CG8439  | <i>Cct5</i>         | <i>cct5</i>                    | not described |
| CG8920  |                     | <i>tdrd7</i>                   | not described |
| CG8977  | <i>Cctgamma</i>     | <i>cct3</i>                    | not described |
| CG9031  |                     | <i>rsu1</i>                    | not described |
| CG9177  | <i>eIF5</i>         | <i>EIF5</i>                    | not described |
| CG9446  | <i>coro</i>         | <i>coro1a, coro1b, coro1ca</i> | not described |
| CG14025 | <i>Bsg25D</i>       | <i>nin</i>                     | not described |
| CG2505  | <i>alpha-Est2</i>   | <i>Not conserved</i>           |               |
| CG4944  | <i>cib</i>          | <i>Not conserved</i>           |               |
| CG10798 | <i>dm</i>           | <i>Not conserved</i>           |               |
| CG6544  | <i>fau</i>          | <i>Not conserved</i>           |               |
| CG3095  | <i>hfw</i>          | <i>Not conserved</i>           |               |
| CG33045 | <i>Kaz1</i>         | <i>Not conserved</i>           |               |
| CG1483  | <i>Map205</i>       | <i>Not conserved</i>           |               |
| CG14233 | <i>meso18E</i>      | <i>Not conserved</i>           |               |
| CG2184  | <i>Mlc2</i>         | <i>Not conserved</i>           |               |
| CG10781 | <i>ng1</i>          | <i>Not conserved</i>           |               |
| CG1685  | <i>pen</i>          | <i>Not conserved</i>           |               |
| CG3969  | <i>PR2</i>          | <i>Not conserved</i>           |               |
| CG2928  | <i>Reg-5</i>        | <i>Not conserved</i>           |               |
| CG7104  | <i>Spz3</i>         | <i>Not conserved</i>           |               |
| CG7869  | <i>SuUR</i>         | <i>Not conserved</i>           |               |
| CG6586  | <i>tan</i>          | <i>Not conserved</i>           |               |
| CG6889  | <i>tara</i>         | <i>Not conserved</i>           |               |
| CG7930  | <i>TpnC73F</i>      | <i>Not conserved</i>           |               |
| CG33261 | <i>Trl</i>          | <i>Not conserved</i>           |               |
| CG12142 | <i>Tsp42EG</i>      | <i>Not conserved</i>           |               |
| CG6531  | <i>wgn</i>          | <i>Not conserved</i>           |               |
| CG12576 |                     | <i>Not conserved</i>           |               |
| CG30118 |                     | <i>Not conserved</i>           |               |
| CG7271  |                     | <i>Not conserved</i>           |               |
| CG33207 | <i>pxb</i>          | <i>Not conserved</i>           |               |
| CG8788  |                     | <i>Not conserved</i>           |               |
| CG15304 | <i>Neb-cGB</i>      | <i>Not conserved</i>           |               |
| CG11076 |                     | <i>Not conserved</i>           |               |
| CG13005 |                     | <i>Not conserved</i>           |               |
| CG18273 |                     | <i>Not conserved</i>           |               |
| CG9330  |                     | <i>Not conserved</i>           |               |
| CG10732 |                     | <i>Not conserved</i>           |               |
| CG30023 |                     | <i>Not conserved</i>           |               |
| CG3371  |                     | <i>Not conserved</i>           |               |
| CG12592 |                     | <i>Not conserved</i>           |               |
| CG2206  |                     | <i>Not conserved</i>           |               |
| CG8289  |                     | <i>Not conserved</i>           |               |
| CG11555 |                     | <i>Not conserved</i>           |               |

|         |  |                      |
|---------|--|----------------------|
| CG1910  |  | <i>Not conserved</i> |
| CG1091  |  | <i>Not conserved</i> |
| CG32625 |  | <i>Not conserved</i> |
| CG8366  |  | <i>Not conserved</i> |
| CG10638 |  | <i>Not conserved</i> |
| CG12819 |  | <i>Not conserved</i> |
| CG13220 |  | <i>Not conserved</i> |
| CG14482 |  | <i>Not conserved</i> |
| CG11771 |  | <i>Not conserved</i> |
| CG18600 |  | <i>Not conserved</i> |
| CG2199  |  | <i>Not conserved</i> |
| CG15717 |  | <i>Not conserved</i> |
| CG7630  |  | <i>Not conserved</i> |
| CG32278 |  | <i>Not conserved</i> |
| CG5080  |  | <i>Not conserved</i> |
| CG33217 |  | <i>Not conserved</i> |
| CG9866  |  | <i>Not conserved</i> |
| CG7920  |  | <i>Not conserved</i> |
| CG32043 |  | <i>Not conserved</i> |
| CG32813 |  | <i>Not conserved</i> |
| CG2003  |  | <i>Not conserved</i> |
| CG3420  |  | <i>Not conserved</i> |
| CG8229  |  | <i>Not conserved</i> |
| CG15064 |  | <i>Not conserved</i> |
| CG8010  |  | <i>Not conserved</i> |
| CG6463  |  | <i>Not conserved</i> |
| CG18809 |  | <i>Not conserved</i> |
| CG14687 |  | <i>Not conserved</i> |
| CG3509  |  | <i>Not conserved</i> |
| CG10669 |  | <i>Not conserved</i> |
| CG1648  |  | <i>Not conserved</i> |
| CG12400 |  | <i>Not conserved</i> |
| CG7458  |  | <i>Not conserved</i> |
| CG9795  |  | <i>Not conserved</i> |
| CG10462 |  | <i>Not conserved</i> |
| CG13503 |  | <i>Not conserved</i> |
| CG5381  |  | <i>Not conserved</i> |
| CG8503  |  | <i>Not conserved</i> |
| CG7526  |  | <i>Not conserved</i> |
| CG1647  |  | <i>Not conserved</i> |
| CG6972  |  | <i>Not conserved</i> |
| CG17572 |  | <i>Not conserved</i> |
| CG33521 |  | <i>Not conserved</i> |
| CG10710 |  | <i>Not conserved</i> |
| CG32355 |  | <i>Not conserved</i> |
| CG14655 |  | <i>Not conserved</i> |
| CG10654 |  | <i>Not conserved</i> |
| CG12701 |  | <i>Not conserved</i> |
| CG4726  |  | <i>Not conserved</i> |
| CG17032 |  | <i>Not conserved</i> |
| CG5690  |  | <i>Not conserved</i> |
| CG18854 |  | <i>Not conserved</i> |
| CG18754 |  | <i>Not conserved</i> |

|         |  |                      |
|---------|--|----------------------|
| CG6429  |  | <i>Not conserved</i> |
| CG4984  |  | <i>Not conserved</i> |
| CG5177  |  | <i>Not conserved</i> |
| CG1674  |  | <i>Not conserved</i> |
| CG13949 |  | <i>Not conserved</i> |
| CG31781 |  | <i>Not conserved</i> |
| CG6803  |  | <i>Not conserved</i> |
| CG18136 |  | <i>Not conserved</i> |

**Genes expressed in zebrafish muscles**

| Gene name         | <i>Drosophila</i> orthologue |                              | <i>Drosophila</i> expression |
|-------------------|------------------------------|------------------------------|------------------------------|
|                   | CG number                    | Gene name                    |                              |
| <i>atp2a1</i>     | CG3725                       | <i>Ca-P60A</i>               | muscular                     |
| <i>atp2a2a</i>    | CG3725                       | <i>Ca-P60A</i>               | muscular                     |
| <i>bysl</i>       | CG1430                       | <i>bys</i>                   | muscular                     |
| <i>ckb</i>        | CG32031                      | <i>Argk</i>                  | muscular                     |
| <i>ckma</i>       | CG32031                      | <i>Argk</i>                  | muscular                     |
| <i>ckmt2</i>      | CG32031                      | <i>Argk</i>                  | muscular                     |
| <i>dldh</i>       | CG7430                       |                              | muscular                     |
| <i>gpia</i>       | CG8251                       | <i>Pgi</i>                   | muscular                     |
| <i>hccs</i>       | CG6022                       | <i>Cchl</i>                  | muscular                     |
| <i>hdlbp</i>      | CG5170                       | <i>Dp1</i>                   | muscular                     |
| <i>hspe1</i>      | CG11267                      |                              | muscular                     |
| <i>ldha</i>       | CG10160                      | <i>ImpL3</i>                 | muscular                     |
| <i>ldhb</i>       | CG10160                      | <i>ImpL3</i>                 | muscular                     |
| <i>mat1a</i>      | CG2674                       | <i>M(2)21AB</i>              | muscular                     |
| <i>mki67ip</i>    | CG6937                       |                              | muscular                     |
| <i>nap1l1</i>     | CG5330                       | <i>Nap1</i>                  | muscular                     |
| <i>nap1l4a</i>    | CG5330                       | <i>Nap1</i>                  | muscular                     |
| <i>pdap1</i>      | CG11444                      |                              | muscular                     |
| <i>pgam2</i>      | CG1721                       | <i>Pglym78</i>               | muscular                     |
| <i>rrs1</i>       | CG32409                      |                              | muscular                     |
| <i>slmo2</i>      | CG9131                       | <i>kisir</i>                 | muscular                     |
| <i>ssb</i>        | CG10922                      | <i>La</i>                    | muscular                     |
| <i>timm50</i>     | CG2713                       | <i>ttm50</i>                 | muscular                     |
| <i>tnni2a.1</i>   | CG7178                       | <i>WupA</i>                  | muscular                     |
| <i>tnni2a.2</i>   | CG7178                       | <i>WupA</i>                  | muscular                     |
| <i>tnni2a.3</i>   | CG7178                       | <i>WupA</i>                  | muscular                     |
| <i>tnni2a.4</i>   | CG7178                       | <i>WupA</i>                  | muscular                     |
| <i>tnni2b.2</i>   | CG7178                       | <i>WupA</i>                  | muscular                     |
| <i>tomm70a</i>    | CG6756                       | <i>Tom70</i>                 | muscular                     |
| <i>tpm2</i>       | CG4843                       | <i>Tm2</i>                   | muscular                     |
| <i>tpm3</i>       | CG4843                       | <i>Tm2</i>                   | muscular                     |
| <i>tpma</i>       | CG4843                       | <i>Tm2</i>                   | muscular                     |
| <i>uqcrfs1</i>    | CG7361                       | <i>RFeSP</i>                 | muscular                     |
| <i>wu:fa07b03</i> | CG5170                       | <i>Dp1</i>                   | muscular                     |
| <i>zgc:56085</i>  | CG32031                      | <i>Argk</i>                  | muscular                     |
| <i>zgc:64133</i>  | CG7998                       |                              | muscular                     |
| <i>acta1a</i>     | CG10067, CG18290, CG4027     | <i>Act57B, Act87E, Act5C</i> | muscular                     |
| <i>acta1b</i>     | CG10067, CG18290, CG4027     | <i>Act57B, Act87E, Act5C</i> | muscular                     |
| <i>acta2</i>      | CG10067, CG18290, CG4027     | <i>Act57B, Act87E, Act5C</i> | muscular                     |
| <i>actn3a</i>     | CG4376                       | <i>Actn</i>                  | muscular                     |
| <i>adkb</i>       | CG11255                      |                              | muscular                     |
| <i>ahcy</i>       | CG11654                      | <i>Ahcy13</i>                | muscular                     |
| <i>ahsa1</i>      | CG1416                       |                              | muscular                     |
| <i>akap1b</i>     | CG3249                       | <i>yu</i>                    | muscular                     |
| <i>atp5d</i>      | CG2968                       |                              | muscular                     |
| <i>atp5g</i>      | CG1746                       |                              | muscular                     |

|                   |         |                      |                 |
|-------------------|---------|----------------------|-----------------|
| <i>atp5h</i>      | CG6030  | ATPsyn-d             | <i>muscular</i> |
| <i>atp5o</i>      | CG4307  | Oscp                 | <i>muscular</i> |
| <i>bop1</i>       | CG5033  |                      | <i>muscular</i> |
| <i>bxdc1</i>      | CG7993  |                      | <i>muscular</i> |
| <i>cct4</i>       | CG5525  |                      | <i>muscular</i> |
| <i>cox4i1</i>     | CG10664 |                      | <i>muscular</i> |
| <i>cox6a1</i>     | CG17280 | <i>levy</i>          | <i>muscular</i> |
| <i>csrp3</i>      | CG33149 | <i>Mlp60A</i>        | <i>muscular</i> |
| <i>cyc1</i>       | CG4769  |                      | <i>muscular</i> |
| <i>dag1</i>       | CG18250 | <i>Dg</i>            | <i>muscular</i> |
| <i>dap3</i>       | CG3633  | <i>mRpS29</i>        | <i>muscular</i> |
| <i>ddx18</i>      | CG6375  | <i>pit</i>           | <i>muscular</i> |
| <i>pit</i>        | CG6375  | <i>pit</i>           | <i>muscular</i> |
| <i>ddx27</i>      | CG2173  | <i>Rs1</i>           | <i>muscular</i> |
| <i>dnajc2</i>     | CG10565 |                      | <i>muscular</i> |
| <i>ehd1</i>       | CG6148  | <i>Past1</i>         | <i>muscular</i> |
| <i>fbp2</i>       | CG31692 | <i>fbp</i>           | <i>muscular</i> |
| <i>fgfr1a</i>     | CG7223  | <i>htl</i>           | <i>muscular</i> |
| <i>fgfr1b</i>     | CG7223  | <i>htl</i>           | <i>muscular</i> |
| <i>gapdh</i>      | CG12055 | <i>Gapdh1</i>        | <i>muscular</i> |
| <i>glud1a</i>     | CG5320  | <i>Gdh</i>           | <i>muscular</i> |
| <i>glud1b</i>     | CG5320  | <i>Gdh</i>           | <i>muscular</i> |
| <i>got2b</i>      | CG4233  |                      | <i>muscular</i> |
| <i>grwd1</i>      | CG12792 | <i>I(2)09851</i>     | <i>muscular</i> |
| <i>gspt1</i>      | CG6382  | <i>Elf</i>           | <i>muscular</i> |
| <i>gyg1</i>       | CG9480  | <i>Glycogenin</i>    | <i>muscular</i> |
| <i>gygl</i>       | CG9480  | <i>Glycogenin</i>    | <i>muscular</i> |
| <i>hspa9b</i>     | CG8542  | <i>Hsc70-5</i>       | <i>muscular</i> |
| <i>hs pb1</i>     | CG4533  | <i>I(2)efl</i>       | <i>muscular</i> |
| <i>hs pb8</i>     | CG4533  | <i>I(2)efl</i>       | <i>muscular</i> |
| <i>hspd1</i>      | CG12101 | <i>Hsp60</i>         | <i>muscular</i> |
| <i>hspg2</i>      | CG7981  | <i>trol</i>          | <i>muscular</i> |
| <i>idh3a</i>      | CG12233 |                      | <i>muscular</i> |
| <i>ilk</i>        | CG10504 | <i>Ilk</i>           | <i>muscular</i> |
| <i>im:6893299</i> | CG8545  |                      | <i>muscular</i> |
| <i>im:7150454</i> | CG6388  |                      | <i>muscular</i> |
| <i>immt</i>       | CG6455  | <i>Motor-protein</i> | <i>muscular</i> |
| <i>itgb4bp4</i>   | CG17611 | <i>eIF6</i>          | <i>muscular</i> |
| <i>jph2</i>       | CG4405  | <i>jp</i>            | <i>muscular</i> |
| <i>kars</i>       | CG12141 | <i>Aats-lys</i>      | <i>muscular</i> |
| <i>kirrel</i>     | CG4125  | <i>rst</i>           | <i>muscular</i> |
| <i>kirrel3</i>    | CG4125  | <i>rst</i>           | <i>muscular</i> |
| <i>ldb3a</i>      | CG17041 |                      | <i>muscular</i> |
| <i>ldb3b</i>      | CG17041 |                      | <i>muscular</i> |
| <i>lin28</i>      | CG17334 | <i>lin-28</i>        | <i>muscular</i> |
| <i>LOC571928</i>  | CG9297  |                      | <i>muscular</i> |
| <i>srl</i>        | CG9297  |                      | <i>muscular</i> |
| <i>lrpprc</i>     | CG14786 |                      | <i>muscular</i> |
| <i>me2</i>        | CG10120 | <i>Men</i>           | <i>muscular</i> |
| <i>me3</i>        | CG10120 | <i>Men</i>           | <i>muscular</i> |
| <i>mef2a</i>      | CG1429  | <i>Mef2</i>          | <i>muscular</i> |
| <i>mef2ca</i>     | CG1429  | <i>Mef2</i>          | <i>muscular</i> |
| <i>mespa</i>      | CG5441  | <i>dei</i>           | <i>muscular</i> |

|                          |         |                  |                 |
|--------------------------|---------|------------------|-----------------|
| <i>mespb</i>             | CG5441  | <i>dei</i>       | <i>muscular</i> |
| <i>met</i>               | CG17348 | <i>drl</i>       | <i>muscular</i> |
| <i>metap2</i>            | CG4008  | <i>und</i>       | <i>muscular</i> |
| <i>metap2l</i>           | CG4008  | <i>und</i>       | <i>muscular</i> |
| <i>mmp14a</i>            | CG4859  | <i>Mmp1</i>      | <i>muscular</i> |
| <i>mrpl12</i>            | CG5012  | <i>mRpL7-L12</i> | <i>muscular</i> |
| <i>msxe</i>              | CG1897  | <i>Msh</i>       | <i>muscular</i> |
| <i>mybpc3</i>            | CG1915  | <i>sls</i>       | <i>muscular</i> |
| <i>ttna</i>              | CG1916  | <i>sls</i>       | <i>muscular</i> |
| <i>ttnb</i>              | CG1917  | <i>sls</i>       | <i>muscular</i> |
| <i>ttnl</i>              | CG1918  | <i>sls</i>       | <i>muscular</i> |
| <i>myo18l1</i>           | CG31045 | <i>Mhcl</i>      | <i>muscular</i> |
| <i>ndufa10</i>           | CG6343  | <i>ND42</i>      | <i>muscular</i> |
| <i>ndufa8</i>            | CG3683  |                  | <i>muscular</i> |
| <i>ndufa9</i>            | CG6020  |                  | <i>muscular</i> |
| <i>ndufv1</i>            | CG9140  |                  | <i>muscular</i> |
| <i>nhp2</i>              | CG5258  | <i>NHP2</i>      | <i>muscular</i> |
| <i>nip7</i>              | CG7006  |                  | <i>muscular</i> |
| <i>noc3l</i>             | CG1234  |                  | <i>muscular</i> |
| <i>nop58</i>             | CG10206 | <i>nop5</i>      | <i>muscular</i> |
| <i>ntn1a</i>             | CG18657 | <i>NetA</i>      | <i>muscular</i> |
| <i>pccb</i>              | CG3267  |                  |                 |
| <i>pdhb</i>              | CG11876 |                  | <i>muscular</i> |
| <i>pfkma</i>             | CG4001  | <i>Pfk</i>       | <i>muscular</i> |
| <i>pkm2b</i>             | CG7070  | <i>PyK</i>       | <i>muscular</i> |
| <i>ppargc1a1</i>         | CG9809  |                  | <i>muscular</i> |
| <i>ppargc1b</i>          | CG9809  |                  | <i>muscular</i> |
| <i>prps1a</i>            | CG6767  |                  | <i>muscular</i> |
| <i>pxn</i>               | CG31794 | <i>Pax</i>       | <i>muscular</i> |
| <i>pygma</i>             | CG7254  | <i>GlyP</i>      | <i>muscular</i> |
| <i>rac3</i>              | CG8556  | <i>Rac2</i>      | <i>muscular</i> |
| <i>rars</i>              | CG9020  |                  | <i>muscular</i> |
| <i>rem1</i>              | CG9811  | <i>Rgk1</i>      | <i>muscular</i> |
| <i>sdha</i>              | CG17246 | <i>Scs-fp</i>    | <i>muscular</i> |
| <i>sdhb</i>              | CG3283  | <i>SdhB</i>      | <i>muscular</i> |
| <i>si:ch211-198n5.11</i> | CG3267  |                  | <i>muscular</i> |
| <i>si:dkey-236e20.6</i>  | CG8461  |                  | <i>muscular</i> |
| <i>si:dkey-34f16.1</i>   | CG5886  |                  | <i>muscular</i> |
| <i>si:dkey-98p3.7</i>    | CG11158 |                  | <i>muscular</i> |
| <i>sid4</i>              | CG7981  | <i>trol</i>      | <i>muscular</i> |
| <i>slc25a3</i>           | CG4994  | <i>Mpcp</i>      | <i>muscular</i> |
| <i>slc25a3l</i>          | CG4994  | <i>Mpcp</i>      | <i>muscular</i> |
| <i>smtnl</i>             | CG3960  |                  | <i>muscular</i> |
| <i>tgm2</i>              | CG7356  |                  | <i>muscular</i> |
| <i>tmem161a</i>          | CG7638  |                  | <i>muscular</i> |
| <i>tmem38a</i>           | CG4239  |                  | <i>muscular</i> |
| <i>tnnt1</i>             | CG7107  | <i>up</i>        | <i>muscular</i> |
| <i>tnnt3a</i>            | CG7108  | <i>up</i>        | <i>muscular</i> |
| <i>tnnt3b</i>            | CG7109  | <i>up</i>        | <i>muscular</i> |
| <i>tomm20</i>            | CG7654  |                  | <i>muscular</i> |
| <i>tpi1b</i>             | CG2171  | <i>Tpi</i>       | <i>muscular</i> |
| <i>vcl</i>               | CG3299  | <i>Vinc</i>      | <i>muscular</i> |
| <i>vdac2</i>             | CG6647  | <i>porin</i>     | <i>muscular</i> |

|                   |                 |                    |                      |
|-------------------|-----------------|--------------------|----------------------|
| <i>vdac3</i>      | CG6647          | <i>porin</i>       | <i>muscular</i>      |
| <i>wdr12</i>      | CG6724          |                    | <i>muscular</i>      |
| <i>zff9</i>       | CG3800          |                    | <i>muscular</i>      |
| <i>zgc:100970</i> | CG4882          |                    | <i>muscular</i>      |
| <i>zgc:103586</i> | CG8353          |                    | <i>muscular</i>      |
| <i>zgc:110137</i> | CG6459          |                    | <i>muscular</i>      |
| <i>zgc:152873</i> | CG8443          |                    | <i>muscular</i>      |
| <i>zgc:165344</i> | CG1915          | <i>sls</i>         | <i>muscular</i>      |
| <i>zgc:55443</i>  | CG12131         | <i>Adam</i>        | <i>muscular</i>      |
| <i>zgc:55926</i>  | CG3001          | <i>Hex-A</i>       | <i>muscular</i>      |
| <i>zgc:56116</i>  | CG17041         |                    | <i>muscular</i>      |
| <i>zgc:65782</i>  | CG11738         |                    | <i>muscular</i>      |
| <i>zgc:66298</i>  | CG4033          | <i>Rpll35</i>      | <i>muscular</i>      |
| <i>zgc:73293</i>  | CG1746          |                    | <i>muscular</i>      |
| <i>zgc:77231</i>  | CG5596          | <i>Mlc1</i>        | <i>muscular</i>      |
| <i>mylz3</i>      | CG5596          | <i>Mlc1</i>        | <i>muscular</i>      |
| <i>zgc:66286</i>  | CG5596          | <i>Mlc1</i>        | <i>muscular</i>      |
| <i>zgc:92611</i>  | CG7519          |                    | <i>muscular</i>      |
| <i>abca1b</i>     | CG9366          | <i>Rhol</i>        | <i>not in muscle</i> |
| <i>ahcyl2</i>     | CG8956          | <i>Ahcy89E</i>     | <i>not in muscle</i> |
| <i>aldh6a1</i>    | CG17896         |                    | <i>not in muscle</i> |
| <i>anxa11</i>     | CG9968          | <i>Anxb11</i>      | <i>not in muscle</i> |
| <i>atp1b1a</i>    | CG8663 - CG9258 |                    | <i>not in muscle</i> |
| <i>atp1b2b</i>    | CG8663          |                    | <i>not in muscle</i> |
| <i>atp1b3b</i>    | CG8663 - CG9258 |                    | <i>not in muscle</i> |
| <i>bin1</i>       | CG8604          | <i>Amph</i>        | <i>not in muscle</i> |
| <i>brf1</i>       | CG31256         |                    | <i>not in muscle</i> |
| <i>c10orf119</i>  | CG3430          |                    | <i>not in muscle</i> |
| <i>cbx5</i>       | CG8409          | <i>Su(var)205</i>  | <i>not in muscle</i> |
| <i>ccna2</i>      | CG5940          | <i>CycA</i>        | <i>not in muscle</i> |
| <i>cdon</i>       | CG9211          | <i>iHog</i>        | <i>not in muscle</i> |
| <i>cdx4</i>       | CG1759          |                    | <i>not in muscle</i> |
| <i>cnp</i>        | CG12918         |                    | <i>not in muscle</i> |
| <i>ctps</i>       | CG6854          |                    | <i>not in muscle</i> |
| <i>cutl1</i>      | CG11387         | <i>ct</i>          | <i>not in muscle</i> |
| <i>dld</i>        | CG3619          | <i>DI</i>          | <i>not in muscle</i> |
| <i>dmd</i>        | CG12265         | <i>Det</i>         | <i>not in muscle</i> |
| <i>eif4ebp3</i>   | CG8846          | <i>Thor</i>        | <i>not in muscle</i> |
| <i>enah</i>       | CG15112         | <i>ena</i>         | <i>not in muscle</i> |
| <i>eng1a</i>      | CG9015          | <i>en</i>          | <i>not in muscle</i> |
| <i>eng1b</i>      | CG9015          | <i>en</i>          | <i>not in muscle</i> |
| <i>eng2a</i>      | CG9015          | <i>en</i>          | <i>not in muscle</i> |
| <i>eya4</i>       | CG9554          | <i>eya</i>         | <i>not in muscle</i> |
| <i>fam46ba</i>    | CG30497         |                    | <i>not in muscle</i> |
| <i>fam46c</i>     | CG30497         |                    | <i>not in muscle</i> |
| <i>fat</i>        | CG33147         | <i>Hs3st-A</i>     | <i>not in muscle</i> |
| <i>fgf3</i>       | CG4608          | <i>bnl</i>         | <i>not in muscle</i> |
| <i>fkbp10</i>     | CG9847          | <i>Fkbp13</i>      | <i>not in muscle</i> |
| <i>flj20195l</i>  | CG14722         |                    | <i>not in muscle</i> |
| <i>flot1a</i>     | CG8200          | <i>Flo</i>         | <i>not in muscle</i> |
| <i>flot1b</i>     | CG8200          | <i>Flo</i>         | <i>not in muscle</i> |
| <i>gmnn</i>       | CG3183          | <i>geminin</i>     | <i>not in muscle</i> |
| <i>gnaia</i>      | CG10060         | <i>G-ialpha65A</i> | <i>not in muscle</i> |

|                   |                                 |                              |                      |
|-------------------|---------------------------------|------------------------------|----------------------|
| <i>gpd2</i>       | CG8256                          | <i>Gpo-1</i>                 | <i>not in muscle</i> |
| <i>gstm</i>       | CG8938                          | <i>GstS1</i>                 | <i>not in muscle</i> |
| <i>homer1</i>     | CG11324                         | <i>homer</i>                 | <i>not in muscle</i> |
| <i>hoxc6a</i>     | CG10388                         | <i>Ubx</i>                   | <i>not in muscle</i> |
| <i>hoxc8a</i>     | CG1028                          | <i>Antp</i>                  | <i>not in muscle</i> |
| <i>idh1</i>       | CG7176                          | <i>Idh</i>                   | <i>not in muscle</i> |
| <i>ifrd2</i>      | CG31694                         |                              | <i>not in muscle</i> |
| <i>im:6894693</i> | CG10078                         | <i>Prat2</i>                 | <i>not in muscle</i> |
| <i>im:6899520</i> | CG9326                          | <i>vari</i>                  | <i>not in muscle</i> |
| <i>im:7138336</i> | CG1815                          |                              | <i>not in muscle</i> |
| <i>im:7145460</i> | CG31721                         | <i>Trim9</i>                 | <i>not in muscle</i> |
| <i>im:7145545</i> | CG11495                         | <i>rasp</i>                  | <i>not in muscle</i> |
| <i>itga6</i>      | CG1771                          | <i>mew</i>                   | <i>not in muscle</i> |
| <i>ktn1</i>       | CG18212                         | <i>alt</i>                   | <i>not in muscle</i> |
| <i>lfng</i>       | CG10580                         | <i>fng</i>                   | <i>not in muscle</i> |
| <i>lfng</i>       | CG10580                         | <i>fng</i>                   | <i>not in muscle</i> |
| <i>lman1</i>      | CG6831                          | <i>rhea</i>                  | <i>not in muscle</i> |
| <i>lmo7a</i>      | CG31534                         |                              | <i>not in muscle</i> |
| <i>mad2l1</i>     | CG17498                         | <i>mad2</i>                  | <i>not in muscle</i> |
| <i>mcam</i>       | CG5803                          | <i>Fas3</i>                  | <i>not in muscle</i> |
| <i>mcm3</i>       | CG4206                          | <i>Mcm3</i>                  | <i>not in muscle</i> |
| <i>mgc4504</i>    | CG10365                         |                              | <i>not in muscle</i> |
| <i>mylip</i>      | CG12489                         |                              | <i>not in muscle</i> |
| <i>nav3</i>       | CG42589                         | <i>sick</i>                  | <i>not in muscle</i> |
| <i>ndel1b</i>     | CG8104                          |                              | <i>not in muscle</i> |
| <i>nlz1</i>       | CG4491                          |                              | <i>not in muscle</i> |
| <i>nmd3</i>       | CG3460                          | <i>Nmd3</i>                  | <i>not in muscle</i> |
| <i>oxct1</i>      | CG1140                          |                              | <i>not in muscle</i> |
| <i>papss2</i>     | CG8363                          | <i>Papss</i>                 | <i>not in muscle</i> |
| <i>pax7</i>       | CG6716                          | <i>prd</i>                   | <i>not in muscle</i> |
| <i>pck1</i>       | CG17725                         | <i>Pepck</i>                 | <i>not in muscle</i> |
| <i>pcna</i>       | CG9193                          | <i>mus209</i>                | <i>not in muscle</i> |
| <i>pfkfb1</i>     | CG3400                          | <i>Pfrx</i>                  | <i>not in muscle</i> |
| <i>pitx3</i>      | CG1447                          | <i>Ptx1</i>                  | <i>not in muscle</i> |
| <i>plu1</i>       | CG9088                          | <i>lid</i>                   | <i>not in muscle</i> |
| <i>prox1</i>      | CG17228                         | <i>pros</i>                  | <i>not in muscle</i> |
| <i>quo</i>        | CG10571                         | <i>ara</i>                   | <i>not in muscle</i> |
| <i>rcc1</i>       | CG32717                         | <i>sdt</i>                   | <i>not in muscle</i> |
| <i>rdx</i>        | CG10701                         | <i>moe</i>                   | <i>not in muscle</i> |
| <i>rhov</i>       | CG34104                         |                              | <i>not in muscle</i> |
| <i>rnd3a</i>      | CG9366                          | <i>RhoL</i>                  | <i>not in muscle</i> |
| <i>rrbp1</i>      | CG18212                         | <i>alt</i>                   | <i>not in muscle</i> |
| <i>rtn3</i>       | CG33113                         | <i>Rtn1</i>                  | <i>not in muscle</i> |
| <i>sall4</i>      | CG4881                          | <i>salr</i>                  | <i>not in muscle</i> |
| <i>scarb1</i>     | CG3829, CG2727, CG4280, CG12789 | <i>emp, crq, santa-maria</i> | <i>not in muscle</i> |
| <i>sh3gl1</i>     | CG14296                         | <i>endoA</i>                 | <i>not in muscle</i> |
| <i>slc25a12</i>   | CG18347                         |                              | <i>not in muscle</i> |
| <i>slc25a22</i>   | CG18347                         |                              | <i>not in muscle</i> |
| <i>slc4a4a</i>    | CG42253                         | <i>Ndae1</i>                 | <i>not in muscle</i> |
| <i>snai1a</i>     | CG3956                          | <i>sna</i>                   | <i>not in muscle</i> |
| <i>snai1b</i>     | CG3956                          | <i>sna</i>                   | <i>not in muscle</i> |
| <i>snai2</i>      | CG3956                          | <i>sna</i>                   | <i>not in muscle</i> |
| <i>sparc</i>      | CG6378                          | <i>BM-40-SPARC</i>           | <i>not in muscle</i> |

|                   |                 |                    |                      |
|-------------------|-----------------|--------------------|----------------------|
| <i>spon1b</i>     | CG17739         |                    | <i>not in muscle</i> |
| <i>src</i>        | CG7524          | <i>Src64B</i>      | <i>not in muscle</i> |
| <i>surf4l</i>     | CG6202          | <i>Surf4</i>       | <i>not in muscle</i> |
| <i>tceb2</i>      | CG4204          | <i>Elongin-B</i>   | <i>not in muscle</i> |
| <i>tead3</i>      | CG8544          | <i>sd</i>          | <i>not in muscle</i> |
| <i>tgfb1</i>      | CG3359-PJ       | <i>mfas</i>        | <i>not in muscle</i> |
| <i>traf4a</i>     | CG3048          | <i>Traf1</i>       | <i>not in muscle</i> |
| <i>tsc22d2</i>    | CG42281         | <i>bun</i>         | <i>not in muscle</i> |
| <i>txnip</i>      | CG7047          |                    | <i>not in muscle</i> |
| <i>wnt11</i>      | CG8458, CG4889  | <i>wntD, wg</i>    | <i>not in muscle</i> |
| <i>wnt11r</i>     | CG8458, CG4889  | <i>wntD, wg</i>    | <i>not in muscle</i> |
| <i>xbp1</i>       | CG9415          | <i>Xbp1</i>        | <i>not in muscle</i> |
| <i>zgc:100990</i> | CG7719          | <i>gwl</i>         | <i>not in muscle</i> |
| <i>zgc:101050</i> | CG31721         | <i>Trim9</i>       | <i>not in muscle</i> |
| <i>zgc:110656</i> | CG33104         | <i>eca</i>         | <i>not in muscle</i> |
| <i>zgc:113518</i> | CG8474, CG14938 | <i>Meics, crol</i> | <i>not in muscle</i> |
| <i>zgc:15867</i>  | CG10763         | <i>Gbeta5</i>      | <i>not in muscle</i> |
| <i>zgc:162269</i> | CG7265          |                    | <i>not in muscle</i> |
| <i>zgc:55309</i>  | CG32066         |                    | <i>not in muscle</i> |
| <i>zgc:55345</i>  | CG1986, CG2985  | <i>Yp1</i>         | <i>not in muscle</i> |
| <i>zgc:56140</i>  | CG4306          |                    | <i>not in muscle</i> |
| <i>zgc:64114</i>  | CG7533          | <i>chrb</i>        | <i>not in muscle</i> |
| <i>zgc:64136</i>  | CG7156          |                    | <i>not in muscle</i> |
| <i>zgc:77254</i>  | CG8205          | <i>fus</i>         | <i>not in muscle</i> |
| <i>zgc:77905</i>  | CG32626         |                    | <i>not in muscle</i> |
| <i>zgc:85948</i>  | CG4816          | <i>qkr54B</i>      | <i>not in muscle</i> |
| <i>zgc:86646</i>  | CG9148          | <i>scf</i>         | <i>not in muscle</i> |
| <i>zgc:86757</i>  | CG31721         | <i>Trim9</i>       | <i>not in muscle</i> |
| <i>zgc:86841</i>  | CG15081         | <i>l(2)03709</i>   | <i>not in muscle</i> |
| <i>zic1</i>       | CG1133          | <i>opa</i>         | <i>not in muscle</i> |
| <i>znf503</i>     | CG4491          | <i>noc</i>         | <i>not in muscle</i> |
| <i>abce1</i>      | CG5651          | <i>pix</i>         | <i>not described</i> |
| <i>abl2</i>       | CG4032          | <i>Abl</i>         | <i>not described</i> |
| <i>aco2</i>       | CG9244          | <i>Acon</i>        | <i>not described</i> |
| <i>alcam</i>      | CG17716         | <i>fas</i>         | <i>not described</i> |
| <i>alcamb</i>     | CG17716         | <i>fas</i>         | <i>not described</i> |
| <i>aldh1a2</i>    | CG3752          | <i>Aldh</i>        | <i>not described</i> |
| <i>aldh7a1</i>    | CG9629          |                    | <i>not described</i> |
| <i>aldoa</i>      | CG6058          | <i>Ald</i>         | <i>not described</i> |
| <i>angptl1</i>    | CG41520         |                    | <i>not described</i> |
| <i>ard1a</i>      | CG11989         | <i>Ard1</i>        | <i>not described</i> |
| <i>arhgap12</i>   | CG1412          | <i>RhoGAP19D</i>   | <i>not described</i> |
| <i>asph</i>       | CG18658         | <i>Asph</i>        | <i>not described</i> |
| <i>atp1a1a.1</i>  | CG5670          |                    | <i>not described</i> |
| <i>atp1a1a.4</i>  | CG5670          |                    | <i>not described</i> |
| <i>atp1a2a</i>    | CG5670          |                    | <i>not described</i> |
| <i>atp2b1a</i>    | CG42314         |                    | <i>not described</i> |
| <i>b3gnt7</i>     | CG11357         |                    | <i>not described</i> |
| <i>bag2</i>       | CG7945          |                    | <i>not described</i> |
| <i>blcap</i>      | CG4867          |                    | <i>not described</i> |
| <i>brpl</i>       | CG16717         |                    | <i>not described</i> |
| <i>btbd10</i>     | CG1216          | <i>mri</i>         | <i>not described</i> |
| <i>btg1</i>       | CG9214          | <i>Tob</i>         | <i>not described</i> |

|                |                |                     |                      |
|----------------|----------------|---------------------|----------------------|
| <i>btg2</i>    | CG9214         | <i>Tob</i>          | <i>not described</i> |
| <i>c12orf2</i> | CG5053         |                     | <i>not described</i> |
| <i>ca2</i>     | CG7820         |                     | <i>not described</i> |
| <i>ca7</i>     | CG7820         |                     | <i>not described</i> |
| <i>calm1a</i>  | CG8472         | <i>Cam</i>          | <i>not described</i> |
| <i>calrl</i>   | CG9429         |                     | <i>not described</i> |
| <i>capza1b</i> | CG10540        | <i>cpa</i>          | <i>not described</i> |
| <i>ccb12</i>   | CG6950         |                     | <i>not described</i> |
| <i>ccnd1</i>   | CG9096         |                     | <i>not described</i> |
| <i>ccng2</i>   | CG11525        | <i>CycG</i>         | <i>not described</i> |
| <i>cdc25</i>   | CG4965, CG1395 | <i>twe, stg</i>     | <i>not described</i> |
| <i>cdkn1b</i>  | CG16912        |                     | <i>not described</i> |
| <i>cdv3</i>    | CG3760         |                     | <i>not described</i> |
| <i>cfl2</i>    | CG4254         |                     | <i>not described</i> |
| <i>chaf1a</i>  | CG12109        | <i>Caf1-180</i>     | <i>not described</i> |
| <i>chchd2</i>  | CG5010         |                     | <i>not described</i> |
| <i>chchd2l</i> | CG5010         |                     | <i>not described</i> |
| <i>clic4</i>   | CG10997        |                     | <i>not described</i> |
| <i>clptm1</i>  | CG3702         |                     | <i>not described</i> |
| <i>clstn1</i>  | CG11059        | <i>cals</i>         | <i>not described</i> |
| <i>col18a1</i> | CG33171        |                     | <i>not described</i> |
| <i>cox5a</i>   | CG14724        | <i>CoVa</i>         | <i>not described</i> |
| <i>cpn1</i>    | CG8717         | <i>slv</i>          | <i>not described</i> |
| <i>crabp1b</i> | CG6783         |                     | <i>not described</i> |
| <i>crabp2a</i> | CG6783         |                     | <i>not described</i> |
| <i>cugbp1</i>  | CG31761        |                     | <i>not described</i> |
| <i>cugbp2</i>  | CG31761        |                     | <i>not described</i> |
| <i>cyp4</i>    | CG1488         | <i>Cyp311a1</i>     | <i>not described</i> |
| <i>dlst</i>    | CG5214         |                     | <i>not described</i> |
| <i>dnaja</i>   | CG2790         |                     | <i>not described</i> |
| <i>dnttip2</i> | CG1142         |                     | <i>not described</i> |
| <i>dtl</i>     | CG11295        | <i>l(2)dtl</i>      | <i>not described</i> |
| <i>ef1a</i>    | CG1873         | <i>Ef1alpha100E</i> | <i>not described</i> |
| <i>efnb2a</i>  | CG1862         | <i>Ephrin</i>       | <i>not described</i> |
| <i>eif2s1</i>  | CG9946         | <i>eIF-2alpha</i>   | <i>not described</i> |
| <i>eif4a1a</i> | CG9075         | <i>eIF-4a</i>       | <i>not described</i> |
| <i>ek3</i>     | CG1511         | <i>Eph</i>          | <i>not described</i> |
| <i>ell2</i>    | CG32217        | <i>Su(Tpl)</i>      | <i>not described</i> |
| <i>eno3</i>    | CG17654        | <i>Eno</i>          | <i>not described</i> |
| <i>epha4a</i>  | CG5935         | <i>Dek</i>          | <i>not described</i> |
| <i>erm</i>     | CG6892         | <i>Ets96B</i>       | <i>not described</i> |
| <i>etfa</i>    | CG8996         | <i>wal</i>          | <i>not described</i> |
| <i>exosc4</i>  | CG15481        |                     | <i>not described</i> |
| <i>fabp3</i>   | CG6783         |                     | <i>not described</i> |
| <i>farsl</i>   | CG5706         |                     | <i>not described</i> |
| <i>fbl</i>     | CG9888         | <i>Fib</i>          | <i>not described</i> |
| <i>fbxo9</i>   | CG5961         |                     | <i>not described</i> |
| <i>fgfr4</i>   | CG32134        | <i>btl</i>          | <i>not described</i> |
| <i>flot2a</i>  | CG32593        | <i>Flo-2</i>        | <i>not described</i> |
| <i>foxc1a</i>  | CG5069         | <i>croc</i>         | <i>not described</i> |
| <i>fryb</i>    | CG32045        | <i>fry</i>          | <i>not described</i> |
| <i>fst</i>     | CG33466        |                     | <i>not described</i> |
| <i>fts</i>     | CG8939         |                     | <i>not described</i> |

|                   |                      |                    |                      |
|-------------------|----------------------|--------------------|----------------------|
| <i>ftsj</i>       | CG6379               |                    | <i>not described</i> |
| <i>fxr1</i>       | CG6203               | <i>Fmr1</i>        | <i>not described</i> |
| <i>fxr2</i>       | CG6203               | <i>Fmr1</i>        | <i>not described</i> |
| <i>fzd2</i>       | CG17697              | <i>fz</i>          | <i>not described</i> |
| <i>fzd7b</i>      | CG17697              | <i>fz</i>          | <i>not described</i> |
| <i>gadd45b</i>    | CG11086              | <i>Gadd45</i>      | <i>not described</i> |
| <i>gcdh</i>       | CG9547               |                    | <i>not described</i> |
| <i>gemin5</i>     | CG30149              | <i>rig</i>         | <i>not described</i> |
| <i>gipc1</i>      | CG11546              | <i>l(2)02045</i>   | <i>not described</i> |
| <i>glo1</i>       | CG1707               |                    | <i>not described</i> |
| <i>glra4a</i>     | CG7535               | <i>GluClalpha</i>  | <i>not described</i> |
| <i>gltscr1</i>    | CG11873              |                    | <i>not described</i> |
| <i>glula</i>      | CG1743               | <i>Gs2</i>         | <i>not described</i> |
| <i>glulb</i>      | CG1743               | <i>Gs2</i>         | <i>not described</i> |
| <i>gmps</i>       | CG9242               | <i>bur</i>         | <i>not described</i> |
| <i>gnl3</i>       | CG3983               |                    | <i>not described</i> |
| <i>gpd1l</i>      | CG9042               | <i>Gpdh</i>        | <i>not described</i> |
| <i>gpsn2</i>      | CG10849              | <i>Sc2</i>         | <i>not described</i> |
| <i>gpt2</i>       | CG1640               |                    | <i>not described</i> |
| <i>gpx4b</i>      | CG15116              |                    | <i>not described</i> |
| <i>gsn</i>        | CG1106               | <i>Ge1</i>         | <i>not described</i> |
| <i>hadha</i>      | CG4389               |                    | <i>not described</i> |
| <i>heg</i>        | CG8365, CG5927       | <i>E(spl), Her</i> | <i>not described</i> |
| <i>her1</i>       | CG8365, CG5927       | <i>E(spl), Her</i> | <i>not described</i> |
| <i>her12</i>      | CG8365, CG5927       | <i>E(spl), Her</i> | <i>not described</i> |
| <i>her4</i>       | CG8365, CG5927       | <i>E(spl), Her</i> | <i>not described</i> |
| <i>her6</i>       | CG8704               |                    | <i>not described</i> |
| <i>her7</i>       | CG8365, CG5927       | <i>E(spl), Her</i> | <i>not described</i> |
| <i>hey1</i>       | CG11194              | <i>Hey</i>         | <i>not described</i> |
| <i>hgfa</i>       | CG42326              |                    | <i>not described</i> |
| <i>hig1</i>       | CG11825 -<br>CG17734 |                    | <i>not described</i> |
| <i>hmgb3a</i>     | CG12223              | <i>Dsp1</i>        | <i>not described</i> |
| <i>hmgcs1</i>     | CG4311               | <i>Hmgs</i>        | <i>not described</i> |
| <i>hoxa3a</i>     | CG11551              | <i>ind</i>         | <i>not described</i> |
| <i>hoxb1b</i>     | CG31481              | <i>pb</i>          | <i>not described</i> |
| <i>hsp90a</i>     | CG1242               | <i>Hsp83</i>       | <i>not described</i> |
| <i>hsp90a2</i>    | CG1242               | <i>Hsp83</i>       | <i>not described</i> |
| <i>hspa5</i>      | CG4147               | <i>Hsc70-3</i>     | <i>not described</i> |
| <i>hspa8</i>      | CG4264               | <i>Hsc70-4</i>     | <i>not described</i> |
| <i>id6</i>        | CG40452              | <i>Snap25</i>      | <i>not described</i> |
| <i>im:6895726</i> | CG7010               | <i>l(1)G0334</i>   | <i>not described</i> |
| <i>im:6897973</i> | CG6008               | <i>NP15.6</i>      | <i>not described</i> |
| <i>im:6900881</i> | CG3560               |                    | <i>not described</i> |
| <i>im:6904860</i> | CG3849               | <i>Lasp</i>        | <i>not described</i> |
| <i>im:6908140</i> | CG1324               |                    | <i>not described</i> |
| <i>im:6910566</i> | CG3688               | <i>l(2)35Bd</i>    | <i>not described</i> |
| <i>im:7136059</i> | CG17184              |                    | <i>not described</i> |
| <i>im:7137805</i> | CG33513              | <i>Nmdar2</i>      | <i>not described</i> |
| <i>im:7138651</i> | CG11007              |                    | <i>not described</i> |
| <i>im:7139709</i> | CG18255              | <i>Strn-Mlck</i>   | <i>not described</i> |
| <i>im:7143671</i> | CG42248              |                    | <i>not described</i> |
| <i>im:7145859</i> | CG14991, CG7729      | <i>Fit1, Fit2</i>  | <i>not described</i> |
| <i>im:7150907</i> | CG32063              |                    | <i>not described</i> |

|                   |                 |                     |                      |
|-------------------|-----------------|---------------------|----------------------|
| <i>im:7151086</i> | CG2919          | <i>asl</i>          | <i>not described</i> |
| <i>im:7154480</i> | CG4656          | <i>Rassf</i>        | <i>not described</i> |
| <i>im:7154697</i> | CG11348         | <i>nAcRbeta-64B</i> | <i>not described</i> |
| <i>im:7155372</i> | CG9635          | <i>RhoGEF2</i>      | <i>not described</i> |
| <i>imp4</i>       | CG11920         | <i>no</i>           | <i>not described</i> |
| <i>impdh2</i>     | CG1799          | <i>ras</i>          | <i>not described</i> |
| <i>itga5</i>      | CG16993         | <i>in</i>           | <i>not described</i> |
| <i>itgb1</i>      | CG1560          | <i>mys</i>          | <i>not described</i> |
| <i>ivd</i>        | CG6638-RA       |                     | <i>not described</i> |
| <i>jag2</i>       | CG6127          | <i>Ser</i>          | <i>not described</i> |
| <i>jak1</i>       | CG1594          | <i>bop</i>          | <i>not described</i> |
| <i>kctd9</i>      | CG14647         |                     | <i>not described</i> |
| <i>khdrbs1</i>    | CG4816          | <i>qkr54B</i>       | <i>not described</i> |
| <i>kif7</i>       | CG1708          | <i>cos</i>          | <i>not described</i> |
| <i>kpnb3</i>      | CG1059          | <i>Karybeta3</i>    | <i>not described</i> |
| <i>lars</i>       | CG33123         |                     | <i>not described</i> |
| <i>ldb3l</i>      | CG30084         | <i>Zasp52</i>       | <i>not described</i> |
| <i>lin7a</i>      | CG7662          | <i>veli</i>         | <i>not described</i> |
| <i>lmna</i>       | CG6944, CG10119 | <i>Lam, LamC</i>    | <i>not described</i> |
| <i>lox3b</i>      | CG4402          | <i>lox2</i>         | <i>not described</i> |
| <i>lrig1</i>      | CG8434          | <i>lbk</i>          | <i>not described</i> |
| <i>lrrc17</i>     | CG8355          | <i>sli</i>          | <i>not described</i> |
| <i>mafl</i>       | CG10034         |                     | <i>not described</i> |
| <i>map3k4</i>     | CG7717          | <i>Mekk1</i>        | <i>not described</i> |
| <i>mars</i>       | CG15100         |                     | <i>not described</i> |
| <i>meis1</i>      | CG17117         | <i>hth</i>          | <i>not described</i> |
| <i>meis3</i>      | CG17117         | <i>hth</i>          | <i>not described</i> |
| <i>meis4.1a</i>   | CG17117         | <i>hth</i>          | <i>not described</i> |
| <i>meox1</i>      | CG5264          | <i>btn</i>          | <i>not described</i> |
| <i>mfn1</i>       | CG4568, CG3869  | <i>fzo, Marf</i>    | <i>not described</i> |
| <i>mibp2</i>      | CG12016         |                     | <i>not described</i> |
| <i>minal</i>      | CG2982          |                     | <i>not described</i> |
| <i>mrpl37</i>     | CG42632         | <i>mRpl37</i>       | <i>not described</i> |
| <i>mrrf</i>       | CG4447          |                     | <i>not described</i> |
| <i>msh6</i>       | CG7003          |                     | <i>not described</i> |
| <i>mt-nd2</i>     | CG34063         | <i>mt:ND2</i>       | <i>not described</i> |
| <i>mtor</i>       | CG5092          | <i>Tor</i>          | <i>not described</i> |
| <i>mtx1</i>       | CG9393          |                     | <i>not described</i> |
| <i>musk</i>       | CG4007          | <i>Nrk</i>          | <i>not described</i> |
| <i>mybbp1a</i>    | CG6189          | <i>l(1)1Bi</i>      | <i>not described</i> |
| <i>myf5</i>       | CG10250         | <i>nau</i>          | <i>not described</i> |
| <i>myhc4</i>      | <i>Mhc</i>      |                     | <i>not described</i> |
| <i>myhz2</i>      | <i>Mhc</i>      |                     | <i>not described</i> |
| <i>myl10</i>      | CG3595          | <i>sqh</i>          | <i>not described</i> |
| <i>mylz2</i>      | CG3595          | <i>sqh</i>          | <i>not described</i> |
| <i>myod</i>       | CG10250         | <i>nau</i>          | <i>not described</i> |
| <i>myog</i>       | CG10250         | <i>nau</i>          | <i>not described</i> |
| <i>narg1b</i>     | CG12202         |                     | <i>not described</i> |
| <i>ndufa4</i>     | CG32230         |                     | <i>not described</i> |
| <i>ndufb4</i>     | CG12859         |                     | <i>not described</i> |
| <i>nhp2l1</i>     | CG3949          | <i>hoip</i>         | <i>not described</i> |
| <i>nnp1</i>       | CG12396         | <i>Nnp-1</i>        | <i>not described</i> |
| <i>noc4l</i>      | CG2875          |                     | <i>not described</i> |

|                 |                  |                        |                      |
|-----------------|------------------|------------------------|----------------------|
| <i>notch2</i>   | CG3936           | N                      | <i>not described</i> |
| <i>notch3</i>   | CG3936           | N                      | <i>not described</i> |
| <i>npm1</i>     | CG7911 - CG7917  | Nlp                    | <i>not described</i> |
| <i>nr5a2</i>    | CG4059           | <i>ftz-f1</i>          | <i>not described</i> |
| <i>nucb2a</i>   | CG32190          | NUCB1                  | <i>not described</i> |
| <i>odz3</i>     | CG5723           | <i>Ten-m</i>           | <i>not described</i> |
| <i>ogdh</i>     | CG33791, Nc73EF  |                        | <i>not described</i> |
| <i>pa2g4a</i>   | CG10576          |                        | <i>not described</i> |
| <i>pabpc4</i>   | CG5119           | <i>pAbp</i>            | <i>not described</i> |
| <i>pcdh15a</i>  | CG31009          | <i>Cad99C</i>          | <i>not described</i> |
| <i>phc2</i>     | CG3895 - CG18412 |                        | <i>not described</i> |
| <i>pik3r3</i>   | CG2699           | <i>Pi3K21B</i>         | <i>not described</i> |
| <i>pinx1</i>    | CG11180          |                        | <i>not described</i> |
| <i>plk1</i>     | CG12306          | <i>polo</i>            | <i>not described</i> |
| <i>polr1a</i>   | <i>Rpl1</i>      | <i>no</i>              | <i>not described</i> |
| <i>ppan</i>     | CG5786           | <i>ppan</i>            | <i>not described</i> |
| <i>ppp3cca</i>  | CG9842, CG1455   | <i>Pp2B-14D, CanA1</i> | <i>not described</i> |
| <i>prdx3</i>    | CG5826           | <i>Prx3</i>            | <i>not described</i> |
| <i>prickle2</i> | CG12833, CG11084 | <i>esn, pk</i>         | <i>not described</i> |
| <i>prkaa1</i>   | CG3051           | <i>SNF1A</i>           | <i>not described</i> |
| <i>psat1</i>    | CG11899          |                        | <i>not described</i> |
| <i>ptc1</i>     | CG2411           | <i>ptc</i>             | <i>not described</i> |
| <i>ptprk</i>    | CG7180           |                        | <i>not described</i> |
| <i>pwp2h</i>    | CG12325          |                        | <i>not described</i> |
| <i>qk</i>       | CG10293          | <i>how</i>             | <i>not described</i> |
| <i>ranbp9</i>   | CG42236          |                        | <i>not described</i> |
| <i>rbp1a</i>    | CG6783           |                        | <i>not described</i> |
| <i>robo3</i>    | CG13521          | <i>robo</i>            | <i>not described</i> |
| <i>rock2b</i>   | CG9774           | <i>rok</i>             | <i>not described</i> |
| <i>rp42-pen</i> | CG7427           |                        | <i>not described</i> |
| <i>rpl7l1</i>   | CG4897, CG5317   | <i>RpL7</i>            | <i>not described</i> |
| <i>rplp0</i>    | CG7490           | <i>RpP0</i>            | <i>not described</i> |
| <i>rrm2</i>     | CG8975           | <i>RnrS</i>            | <i>not described</i> |
| <i>rtcd1</i>    | CG4061           |                        | <i>not described</i> |
| <i>sars</i>     | CG17259          |                        | <i>not described</i> |
| <i>sdc2</i>     | CG3985           | <i>Syn</i>             | <i>not described</i> |
| <i>sep15</i>    | CG7484           |                        | <i>not described</i> |
| <i>siah1</i>    | CG9949           | <i>sina</i>            | <i>not described</i> |
| <i>skp2</i>     | CG9772           |                        | <i>not described</i> |
| <i>slc16a3</i>  | CG11665, CG8271  |                        | <i>not described</i> |
| <i>slc1a3</i>   | CG3747           | <i>Eaat1</i>           | <i>not described</i> |
| <i>smoc2</i>    | CG2264           | <i>no</i>              | <i>not described</i> |
| <i>smyd1</i>    | CG13761          | <i>Bzd</i>             | <i>not described</i> |
| <i>smyhc1</i>   | CG17927          | <i>Mhc</i>             | <i>not described</i> |
| <i>sol</i>      | CG10069          |                        | <i>not described</i> |
| <i>sox11a</i>   | CG8404           | <i>Sox15</i>           | <i>not described</i> |
| <i>sox9a</i>    | CG15552, CG8404  | <i>Sox100B, Sox15</i>  | <i>not described</i> |
| <i>spry4</i>    | CG1921           | <i>sty</i>             | <i>not described</i> |
| <i>sps2</i>     | CG8553           | <i>Seld</i>            | <i>not described</i> |
| <i>stmn1</i>    | CG31641          | <i>stai</i>            | <i>not described</i> |
| <i>stm3</i>     | CG7392           | <i>Cka</i>             | <i>not described</i> |
| <i>sucla2</i>   | CG11963          |                        | <i>not described</i> |
| <i>suclg1</i>   | CG1065           | <i>Scsalpha</i>        | <i>not described</i> |

|                   |                                                          |                       |                      |
|-------------------|----------------------------------------------------------|-----------------------|----------------------|
| <i>surf6l</i>     | CG4510                                                   | <i>Surf6</i>          | <i>not described</i> |
| <i>sycp3</i>      | CG6016                                                   |                       | <i>not described</i> |
| <i>tfb2m</i>      | CG3910                                                   | <i>mtTFB2</i>         | <i>not described</i> |
| <i>tob1a</i>      | CG9214                                                   | <i>Tob</i>            | <i>not described</i> |
| <i>tomm34</i>     | CG13570                                                  | <i>spag</i>           | <i>not described</i> |
| <i>tp73</i>       | CG33336                                                  | <i>p53</i>            | <i>not described</i> |
| <i>ube2l3</i>     | CG5788, CG12799                                          | <i>UbcD10, Ubc84D</i> | <i>not described</i> |
| <i>unc45r</i>     | CG2708                                                   | <i>Tom34</i>          | <i>not described</i> |
| <i>vegf</i>       | CG31641                                                  | <i>stai</i>           | <i>not described</i> |
| <i>wdr75</i>      | CG12050                                                  |                       | <i>not described</i> |
| <i>yars</i>       | CG4561                                                   |                       | <i>not described</i> |
| <i>za20d2</i>     | CG15368, CG33936                                         |                       | <i>not described</i> |
| <i>zdhhc5</i>     | CG34449                                                  |                       | <i>not described</i> |
| <i>zgc:100860</i> | CG12231, CG7222                                          |                       | <i>not described</i> |
| <i>zgc:100924</i> | CG14808                                                  | <i>Scgdelta</i>       | <i>not described</i> |
| <i>zgc:101687</i> | CG30280, CG30281,<br>CG6788, CG32496,<br>CG9500, CG41520 |                       | <i>not described</i> |
| <i>zgc:101748</i> | CG12128                                                  |                       | <i>not described</i> |
| <i>zgc:110322</i> | CG10470                                                  |                       | <i>not described</i> |
| <i>zgc:110766</i> | CG6050                                                   | <i>EftuM</i>          | <i>not described</i> |
| <i>zgc:111822</i> | CG2691                                                   |                       | <i>not described</i> |
| <i>zgc:111840</i> | CG13852                                                  | <i>mats</i>           | <i>not described</i> |
| <i>zgc:112052</i> | CG3740, CG11671                                          |                       | <i>not described</i> |
| <i>zgc:113583</i> | CG4276, CG8907                                           | <i>aru</i>            | <i>not described</i> |
| <i>zgc:114164</i> | CG3201                                                   | <i>Mlc-c</i>          | <i>not described</i> |
| <i>zgc:136894</i> | CG34289                                                  |                       | <i>not described</i> |
| <i>zgc:158673</i> | CG31332                                                  | <i>unc-115</i>        | <i>not described</i> |
| <i>zgc:55519</i>  | CG3808                                                   |                       | <i>not described</i> |
| <i>zgc:55912</i>  | CG5807                                                   |                       | <i>not described</i> |
| <i>zgc:55912</i>  | CG5807                                                   |                       | <i>not described</i> |
| <i>zgc:56216</i>  | CG9328                                                   |                       | <i>not described</i> |
| <i>zgc:56251</i>  | CG11138                                                  |                       | <i>not described</i> |
| <i>zgc:56340</i>  | CG7425                                                   | <i>eff</i>            | <i>not described</i> |
| <i>zgc:56363</i>  | CG6385                                                   |                       | <i>not described</i> |
| <i>zgc:56391</i>  | CG9399                                                   |                       | <i>not described</i> |
| <i>zgc:56558</i>  | CG10524                                                  | <i>Pkcdelta</i>       | <i>not described</i> |
| <i>zgc:63569</i>  | CG11880                                                  |                       | <i>not described</i> |
| <i>zgc:63783</i>  | CG9075                                                   | <i>eIF-4a</i>         | <i>not described</i> |
| <i>zgc:63864</i>  | CG11138                                                  |                       | <i>not described</i> |
| <i>zgc:63903</i>  | CG7761                                                   | <i>pcs</i>            | <i>not described</i> |
| <i>zgc:63911</i>  | CG4444                                                   | <i>px</i>             | <i>not described</i> |
| <i>zgc:63976</i>  | CG12304                                                  |                       | <i>not described</i> |
| <i>zgc:64113</i>  | CG16979                                                  |                       | <i>not described</i> |
| <i>zgc:65840</i>  | CG13388                                                  | <i>Akap200</i>        | <i>not described</i> |
| <i>zgc:66119</i>  | CG1994                                                   |                       | <i>not described</i> |
| <i>zgc:66156</i>  | CG17927                                                  | <i>Mhc</i>            | <i>not described</i> |
| <i>zgc:66311</i>  | CG10990                                                  |                       | <i>not described</i> |
| <i>zgc:66340</i>  | CG4272                                                   |                       | <i>not described</i> |
| <i>zgc:66353</i>  | CG1487                                                   | <i>krz</i>            | <i>not described</i> |
| <i>zgc:73152</i>  |                                                          | <i>Eno</i>            | <i>not described</i> |
| <i>zgc:73179</i>  | CG14861                                                  |                       | <i>not described</i> |

|                  |                            |                  |                      |
|------------------|----------------------------|------------------|----------------------|
| <i>zgc:73247</i> | CG12661, CG5323,<br>CG5327 |                  | <i>not described</i> |
| <i>zgc:73271</i> | CG7010, CG7024             | <i>l(1)G0334</i> | <i>not described</i> |
| <i>zgc:77126</i> | CG5232                     | <i>Neu5Ac</i>    | <i>not described</i> |
| <i>zgc:77199</i> | CG5018                     |                  | <i>not described</i> |
| <i>zgc:77225</i> | CG10320                    |                  | <i>not described</i> |
| <i>zgc:77696</i> | CG6058                     | <i>Ald</i>       | <i>not described</i> |
| <i>zgc:77702</i> | CG3922                     | <i>RpS17</i>     | <i>not described</i> |
| <i>zgc:77750</i> | CG11495                    | <i>rasp</i>      | <i>not described</i> |
| <i>zgc:86749</i> | CG1418                     |                  | <i>not described</i> |
| <i>zgc:86806</i> | CG12085                    | <i>pUf68</i>     | <i>not described</i> |
| <i>zgc:91930</i> | CG17146                    | <i>Adk1</i>      | <i>not described</i> |
| <i>zgc:91999</i> | CG33094                    | <i>Synd</i>      | <i>not described</i> |
| <i>zgc:92066</i> | CG4349                     | <i>Fer3HCH</i>   | <i>not described</i> |
| <i>zgc:92072</i> | CG7219                     | <i>no</i>        | <i>not described</i> |
| <i>zgc:92429</i> | CG6198                     | <i>chp</i>       | <i>not described</i> |
| <i>anxa6</i>     | <i>Not conserved</i>       |                  |                      |
| <i>bckdk</i>     | <i>Not conserved</i>       |                  |                      |
| <i>bcl6</i>      | <i>Not conserved</i>       |                  |                      |
| <i>bhik</i>      | <i>Not conserved</i>       |                  |                      |
| <i>c20orf149</i> | <i>Not conserved</i>       |                  |                      |
| <i>c4orf9</i>    | <i>Not conserved</i>       |                  |                      |
| <i>casq2</i>     | <i>Not conserved</i>       |                  |                      |
| <i>cav3</i>      | <i>Not conserved</i>       |                  |                      |
| <i>cbs</i>       | <i>Not conserved</i>       |                  |                      |
| <i>cdkn1c</i>    | <i>Not conserved</i>       |                  |                      |
| <i>cenpn</i>     | <i>Not conserved</i>       |                  |                      |
| <i>cilp</i>      | <i>Not conserved</i>       |                  |                      |
| <i>cited3</i>    | <i>Not conserved</i>       |                  |                      |
| <i>cmyc</i>      | <i>Not conserved</i>       |                  |                      |
| <i>col1a1</i>    | <i>Not conserved</i>       |                  |                      |
| <i>col1a2</i>    | <i>Not conserved</i>       |                  |                      |
| <i>col5a2l</i>   | <i>Not conserved</i>       |                  |                      |
| <i>crabp2b</i>   | <i>Not conserved</i>       |                  |                      |
| <i>crip2</i>     | <i>Not conserved</i>       |                  |                      |
| <i>crygm4</i>    | <i>Not conserved</i>       |                  |                      |
| <i>cspg2</i>     | <i>Not conserved</i>       |                  |                      |
| <i>cx43.4</i>    | <i>Not conserved</i>       |                  |                      |
| <i>cxcr4a</i>    | <i>Not conserved</i>       |                  |                      |
| <i>cxcr4b</i>    | <i>Not conserved</i>       |                  |                      |
| <i>cxcr7b</i>    | <i>Not conserved</i>       |                  |                      |
| <i>cyp26a1</i>   | <i>Not conserved</i>       |                  |                      |
| <i>dact1</i>     | <i>Not conserved</i>       |                  |                      |
| <i>dact2</i>     | <i>Not conserved</i>       |                  |                      |
| <i>ddx21</i>     | <i>Not conserved</i>       |                  |                      |
| <i>desm</i>      | <i>Not conserved</i>       |                  |                      |
| <i>dnmt1</i>     | <i>Not conserved</i>       |                  |                      |
| <i>dspg3</i>     | <i>Not conserved</i>       |                  |                      |
| <i>eef2k</i>     | <i>Not conserved</i>       |                  |                      |
| <i>efna1</i>     | <i>Not conserved</i>       |                  |                      |
| <i>egfl6</i>     | <i>Not conserved</i>       |                  |                      |
| <i>ephx2</i>     | <i>Not conserved</i>       |                  |                      |
| <i>ets1</i>      | <i>Not conserved</i>       |                  |                      |
| <i>fam3c</i>     | <i>Not conserved</i>       |                  |                      |

|                   |                      |
|-------------------|----------------------|
| <i>fgf17b</i>     | <i>Not conserved</i> |
| <i>fgf8</i>       | <i>Not conserved</i> |
| <i>fibin</i>      | <i>Not conserved</i> |
| <i>fn1b</i>       | <i>Not conserved</i> |
| <i>frem3</i>      | <i>Not conserved</i> |
| <i>fstl1</i>      | <i>Not conserved</i> |
| <i>fstl1b</i>     | <i>Not conserved</i> |
| <i>gas1a</i>      | <i>Not conserved</i> |
| <i>gatm</i>       | <i>Not conserved</i> |
| <i>gngt2</i>      | <i>Not conserved</i> |
| <i>grem1</i>      | <i>Not conserved</i> |
| <i>hfe2</i>       | <i>Not conserved</i> |
| <i>homez</i>      | <i>Not conserved</i> |
| <i>hprt1</i>      | <i>Not conserved</i> |
| <i>il17rd</i>     | <i>Not conserved</i> |
| <i>im:6894309</i> | <i>Not conserved</i> |
| <i>im:6903726</i> | <i>Not conserved</i> |
| <i>im:6908722</i> | <i>Not conserved</i> |
| <i>im:7136220</i> | <i>Not conserved</i> |
| <i>im:7136462</i> | <i>Not conserved</i> |
| <i>im:7137300</i> | <i>Not conserved</i> |
| <i>im:7137453</i> | <i>Not conserved</i> |
| <i>im:7139860</i> | <i>Not conserved</i> |
| <i>im:7139868</i> | <i>Not conserved</i> |
| <i>im:7144089</i> | <i>Not conserved</i> |
| <i>im:7147834</i> | <i>Not conserved</i> |
| <i>im:7151282</i> | <i>Not conserved</i> |
| <i>im:7153080</i> | <i>Not conserved</i> |
| <i>kbtbd10</i>    | <i>Not conserved</i> |
| <i>lgmn</i>       | <i>Not conserved</i> |
| <i>matn4</i>      | <i>Not conserved</i> |
| <i>mcl1l</i>      | <i>Not conserved</i> |
| <i>mt-atp8</i>    | <i>Not conserved</i> |
| <i>mtfr1</i>      | <i>Not conserved</i> |
| <i>mtr</i>        | <i>Not conserved</i> |
| <i>nola2</i>      | <i>Not conserved</i> |
| <i>nrp2b</i>      | <i>Not conserved</i> |
| <i>pald</i>       | <i>Not conserved</i> |
| <i>pcdh8</i>      | <i>Not conserved</i> |
| <i>pdcd11</i>     | <i>Not conserved</i> |
| <i>pmp22b</i>     | <i>Not conserved</i> |
| <i>ppp1r3ca</i>   | <i>Not conserved</i> |
| <i>prdm1</i>      | <i>Not conserved</i> |
| <i>ptprm</i>      | <i>Not conserved</i> |
| <i>pvalbl</i>     | <i>Not conserved</i> |
| <i>rdh8</i>       | <i>Not conserved</i> |
| <i>rgmb</i>       | <i>Not conserved</i> |
| <i>rhog</i>       | <i>Not conserved</i> |
| <i>sema8</i>      | <i>Not conserved</i> |
| <i>sepm</i>       | <i>Not conserved</i> |
| <i>sepn1</i>      | <i>Not conserved</i> |
| <i>sept9</i>      | <i>Not conserved</i> |
| <i>sepx1</i>      | <i>Not conserved</i> |

|                   |                      |
|-------------------|----------------------|
| <i>shisa2</i>     | <i>Not conserved</i> |
| <i>slc25a16</i>   | <i>Not conserved</i> |
| <i>slc38a7</i>    | <i>Not conserved</i> |
| <i>slc43a1</i>    | <i>Not conserved</i> |
| <i>sp5l</i>       | <i>Not conserved</i> |
| <i>sqstm1</i>     | <i>Not conserved</i> |
| <i>ssg1</i>       | <i>Not conserved</i> |
| <i>takrp</i>      | <i>Not conserved</i> |
| <i>tgfbr2</i>     | <i>Not conserved</i> |
| <i>ttn</i>        | <i>Not conserved</i> |
| <i>uncx4.1</i>    | <i>Not conserved</i> |
| <i>ved</i>        | <i>Not conserved</i> |
| <i>xpo4</i>       | <i>Not conserved</i> |
| <i>zgc:100819</i> | <i>Not conserved</i> |
| <i>zgc:100829</i> | <i>Not conserved</i> |
| <i>zgc:100917</i> | <i>Not conserved</i> |
| <i>zgc:101683</i> | <i>Not conserved</i> |
| <i>zgc:101899</i> | <i>Not conserved</i> |
| <i>zgc:110762</i> | <i>Not conserved</i> |
| <i>zgc:112079</i> | <i>Not conserved</i> |
| <i>zgc:153154</i> | <i>Not conserved</i> |
| <i>zgc:55627</i>  | <i>Not conserved</i> |
| <i>zgc:55920</i>  | <i>Not conserved</i> |
| <i>zgc:56005</i>  | <i>Not conserved</i> |
| <i>zgc:56121</i>  | <i>Not conserved</i> |
| <i>zgc:63950</i>  | <i>Not conserved</i> |
| <i>zgc:65787</i>  | <i>Not conserved</i> |
| <i>zgc:66027</i>  | <i>Not conserved</i> |
| <i>zgc:66117</i>  | <i>Not conserved</i> |
| <i>zgc:66326</i>  | <i>Not conserved</i> |
| <i>zgc:66479</i>  | <i>Not conserved</i> |
| <i>zgc:73361</i>  | <i>Not conserved</i> |
| <i>zgc:73375</i>  | <i>Not conserved</i> |
| <i>zgc:77703</i>  | <i>Not conserved</i> |
| <i>zgc:86932</i>  | <i>Not conserved</i> |
| <i>zgc:91870</i>  | <i>Not conserved</i> |
| <i>zgc:91926</i>  | <i>Not conserved</i> |
| <i>zgc:92198</i>  | <i>Not conserved</i> |
| <i>zgc:92242</i>  | <i>Not conserved</i> |
| <i>zgc:92332</i>  | <i>Not conserved</i> |
| <i>zgc:92347</i>  | <i>Not conserved</i> |
| <i>zgc:92502</i>  | <i>Not conserved</i> |
| <i>zic3</i>       | <i>Not conserved</i> |
| <i>znfl1</i>      | <i>Not conserved</i> |
