# Supplementary material
Source: PubMed Central journal article supplement (PMC3839714)
Supplement: 1301262110_st02.pdf [file 1301262110_st02.pdf]

**Table S2A**

|     |               | wt                             | <i>Mef&gt;RNAi Pglym78</i> | <i>duf&gt;RNAi Pglym78</i> | <i>duf&gt;InR<sup>DN</sup></i> | <i>duf&gt;foxo</i>       | <i>duf&gt;4EBP</i>                   | <i>duf&gt;RNAi S6K</i> |                   |                          |                            |  |
|-----|---------------|--------------------------------|----------------------------|----------------------------|--------------------------------|--------------------------|--------------------------------------|------------------------|-------------------|--------------------------|----------------------------|--|
| SBM | Nb of nuclei* | 6,63 ± 0,61                    | 4,43 ± 0,73                | 4,57 ± 0,63                | 3,97 ± 0,93                    | 4,00 ± 0,74              | 3,87 ± 0,63                          | 4,5 ± 0,73             |                   |                          |                            |  |
|     | Size**        | 6,08 ± 0,54                    | 4,41 ± 0,61                | 4,43 ± 1,11                | 4,29 ± 0,38                    | 4,08 ± 1,06              | 3,90 ± 0,74                          | 3,65 ± 3,36            |                   |                          |                            |  |
| DA1 | Nb of nuclei* | 11,03 ± 1,13                   | 7,4 ± 1,22                 | 6,74 ± 0,98                | 5,40 ± 1,00                    | 5,10 ± 1,09              | 6,67 ± 0,80                          | 7,33 ± 1,47            |                   |                          |                            |  |
|     | Size**        | 13,77 ± 2,02                   | 8,18 ± 1,37                | 8,79 ± 1,33                | 7,54 ± 1,69                    | 6,21 ± 1,56              | 7,71 ± 1,58                          | 8,00 ± 1,23            |                   |                          |                            |  |
|     |               | <i>duf&gt;InR<sup>wt</sup></i> | <i>duf&gt;Pten</i>         | <i>Akt1<sup>9</sup></i>    | <i>duf&gt;Akt1</i>             | <i>foxo<sup>25</sup></i> | <i>duf&gt;PI3K92E<sup>CAAX</sup></i> | <i>Mef&gt;RNAi Tor</i> | <i>duf&gt;Tor</i> | <i>Tor<sup>2L1</sup></i> | <i>rictor<sup>A2</sup></i> |  |
| SBM | Nb of nuclei* | 6,6 ± 0,62                     | 3,70 ± 0,65                | 4,6 ± 0,86                 | 6,57 ± 1,10                    | 7,73 ± 1,08              | 6,2 ± 0,89                           | 4,17 ± 0,53            | 6,5 ± 0,86        | 5,13 ± 0,90              | 6,93 ± 0,91                |  |
|     | Size**        | 6,19 ± 0,56                    |                            |                            | 5,32 ± 1,03                    | 5,96 ± 0,47              | 6,18 ± 0,58                          |                        | 5,68 ± 0,46       |                          |                            |  |
| DA1 | Nb of nuclei* | 11,03 ± 1,19                   | 6,13 ± 1,01                | n.d.                       | 11,20 ± 1,27                   | 11,77 ± 1,07             | 10,63 ± 1,50                         | n.d.                   | 11,37 ± 1,27      | n.d.                     | n.d.                       |  |
|     | Size**        | 12,96 ± 1,55                   |                            |                            | 12,88 ± 1,59                   | 12,39 ± 1,23             | 12,78 ± 1,26                         |                        | 12,43 ± 1,31      |                          |                            |  |
|     |               | <i>AMPK<sup>A3</sup></i>       | <i>duf&gt;AMPK</i>         |                            |                                |                          |                                      |                        |                   |                          |                            |  |
| SBM | Nb of nuclei* | 6,50 ± 0,63                    | 6,53 ± 0,73                |                            |                                |                          |                                      |                        |                   |                          |                            |  |
|     | Size**        |                                | 5,84 ± 0,71                |                            |                                |                          |                                      |                        |                   |                          |                            |  |
| DA1 | Nb of nuclei* | n.d.                           | 10,93 ± 1,31               |                            |                                |                          |                                      |                        |                   |                          |                            |  |
|     | Size**        |                                | 12,45 ± 1,62               |                            |                                |                          |                                      |                        |                   |                          |                            |  |

\*For each genotype, the average number of nuclei ± standard deviation is shown (n=30).

\*\*For each genotype, the average size in μm ± standard deviation is shown (n= 20).

**Table S2B**

|                            |                                | stade 12                       | stade 13    | stade 14    | stade 15 early | stade 15 late |              |
|----------------------------|--------------------------------|--------------------------------|-------------|-------------|----------------|---------------|--------------|
| SBM                        | wt                             | 1,05 ± 0,22                    | 2 ± 0,46    | 3,55 ± 0,76 | 4,65 ± 0,67    | 6,8 ± 0,52    |              |
|                            | <i>duf&gt;InR<sup>DN</sup></i> | 1,15 ± 0,37                    | 2,05 ± 0,51 | 3,4 ± 0,82  | 3,95 ± 0,6     | 3,75 ± 0,64   |              |
|                            | <i>duf&gt;Akt1</i>             | 1,2 ± 0,41                     | 2,45 ± 0,61 | 4,15 ± 0,67 | 5,4 ± 1,39     | 6,6 ± 1,27    |              |
|                            | <i>duf&gt;foxo</i>             | 1,15 ± 0,37                    | 2,3 ± 0,57  | 3,5 ± 0,51  | 3,4 ± 0,94     | 3,8 ± 0,7     |              |
|                            | <i>Mef&gt;RNAi Tor</i>         | 1,1 ± 0,31                     | 2,25 ± 0,44 | 3,4 ± 0,6   | 4,0 ± 0,56     | 4,2 ± 0,52    |              |
|                            | <i>duf&gt;4EBP</i>             | 1,05 ± 0,22                    | 2,1 ± 0,31  | 3,05 ± 0,39 | 4,05 ± 0,39    | 3,9 ± 0,55    |              |
|                            | <i>duf&gt;RNAi S6K</i>         | 1,05 ± 0,22                    | 2,2 ± 0,41  | 3,50 ± 0,67 | 4,60 ± 0,50    | 4,55 ± 0,83   |              |
|                            | <i>duf&gt;RNAi Pglym78</i>     | 1,15 ± 0,37                    | 2,35 ± 0,49 | 3,7 ± 0,47  | 4,5 ± 0,51     | 4,4 ± 0,68    |              |
|                            | DA1                            | wt                             | 1,15 ± 0,37 | 2,6 ± 0,88  | 5,4 ± 1        | 7,1 ± 1,51    | 10,95 ± 1,17 |
|                            |                                | <i>duf&gt;InR<sup>DN</sup></i> | 1,25 ± 0,44 | 2,2 ± 0,95  | 4,7 ± 1,38     | 5,6 ± 1,05    | 5,85 ± 0,93  |
| <i>duf&gt;Akt1</i>         |                                | 1,2 ± 0,41                     | 2,50 ± 0,61 | 5,75 ± 0,85 | 7,75 ± 1,6     | 11,55 ± 1,93  |              |
| <i>duf&gt;foxo</i>         |                                | 1,3 ± 0,47                     | 2,4 ± 0,82  | 5 ± 1,38    | 4,8 ± 1,01     | 5,6 ± 0,82    |              |
| <i>duf&gt;4EBP</i>         |                                | 1,1 ± 0,31                     | 2,2 ± 0,41  | 4,2 ± 0,69  | 5,6 ± 0,68     | 6,4 ± 0,75    |              |
| <i>duf&gt;RNAi S6K</i>     |                                | 1,25 ± 0,44                    | 2,2 ± 0,41  | 4,5 ± 0,69  | 6,7 ± 0,98     | 7,4 ± 1,10    |              |
| <i>duf&gt;RNAi Pglym78</i> |                                | 1,25 ± 0,44                    | 2,35 ± 0,59 | 5,0 ± 0,56  | 6,15 ± 1,18    | 6,65 ± 1,14   |              |

For each stage and each genotype, the average number of nuclei ± standard deviation is shown (n=20).
