# Supplementary material
Source: PubMed Central journal article supplement (PMC3839714)
Supplement: 1301262110_st03.pdf [file 1301262110_st03.pdf]

**Table S3**

|                                     | Stage 13               |                            | Stage 14               |                            |
|-------------------------------------|------------------------|----------------------------|------------------------|----------------------------|
|                                     | <i>duf&gt;UAS LacZ</i> | <i>duf&gt;RNAi Pglym78</i> | <i>duf&gt;UAS LacZ</i> | <i>duf&gt;RNAi Pglym78</i> |
| Nb of ventral + lateral Actin foci* | 7,31 ± 1,11            | 5,14 ± 0,83                | 3,41 ± 0,78            | 0,72 ± 0,72                |

|                                     | Stage 13                          |                                       | Stage 14                          |                                       |
|-------------------------------------|-----------------------------------|---------------------------------------|-----------------------------------|---------------------------------------|
|                                     | <i>M6-GAP-GFP;duf&gt;UAS LacZ</i> | <i>M6-GAP-GFP;duf&gt;RNAi Pglym78</i> | <i>M6-GAP-GFP;duf&gt;UAS LacZ</i> | <i>M6-GAP-GFP;duf&gt;RNAi Pglym78</i> |
| Nb of ventral FCM M6-GFP +ve cells* | 4,52 ± 0,91                       | 4,10 ± 0,77                           | 1,31 ± 0,71                       | 3,79 ± 0,73                           |

\*For each stage and each genotype, the average number of foci/cells ± standard deviation is shown (n=30).
